# Supplementary material for: The More the Better—Investigation of Polymethoxylated N-Carboranyl Quinazolines as Novel Hybrid Breast Cancer Resistance Protein Inhibitors
Source: MDPI journal article supplement (doi:10.3390/pharmaceutics15010241), 2023-01-10
Supplement: s1 [file s1]

## Supporting information to:

### The More the Better – Investigation of Polymethoxylated *N*-Carboranyl Quinazolines as Novel Hybrid Breast Cancer Resistance Protein Inhibitors

Philipp Stockmann <sup>1</sup>, Lydia Kuhnert <sup>2,\*</sup>, Wencke Leinung <sup>1,†</sup>, Cathleen Lakoma <sup>2</sup>, Birte Scholz <sup>2</sup>, Svetlana Paskas <sup>3</sup>, Sanja Mijatović <sup>3</sup>, Danijela Maksimović-Ivanić <sup>3</sup>, Walther Honscha <sup>2</sup> and Evamarie Hey-Hawkins <sup>1,\*</sup>

<sup>1</sup> Institute of Inorganic Chemistry, Faculty of Chemistry and Mineralogy, Universität Leipzig, Johannisallee 29, 04103 Leipzig, Germany

<sup>2</sup> Institute of Pharmacology, Pharmacy and Toxicology, Faculty of Veterinary Medicine, Universität Leipzig, An den Tierkliniken 15, 04103 Leipzig, Germany

<sup>3</sup> Department of Immunology, Institute for Biological Research “Siniša Stanković”, Belgrade University, 11060 Belgrade, Serbia

\* Correspondence: lydia.kuhnert@vetmed.uni-leipzig.de (L.K.); hey@uni-leipzig.de (E.H.-H.)

† Current address: Max-Planck-Institut für Kohlenforschung, Kaiser-Wilhelm-Platz 1, 45470 Mülheim an der Ruhr, Germany.

## This PDF file includes

1. NMR spectra of quinazoline-4-amines **Qa-d** and **DMQa-d**  
(Figures S1 to S15)

2. NMR spectra of *N*-carboranyl quinazoline-4-amines **QCa-d** and **DMQCa-d**  
(Figures S16 to S55)

3. Biological Data  
(Figures S56 to S58)

4. Molecular Docking  
(Figure S59, Table S1)

# 1. NMR spectra of quinazoline-4-amines Qa-d and DMQa-d

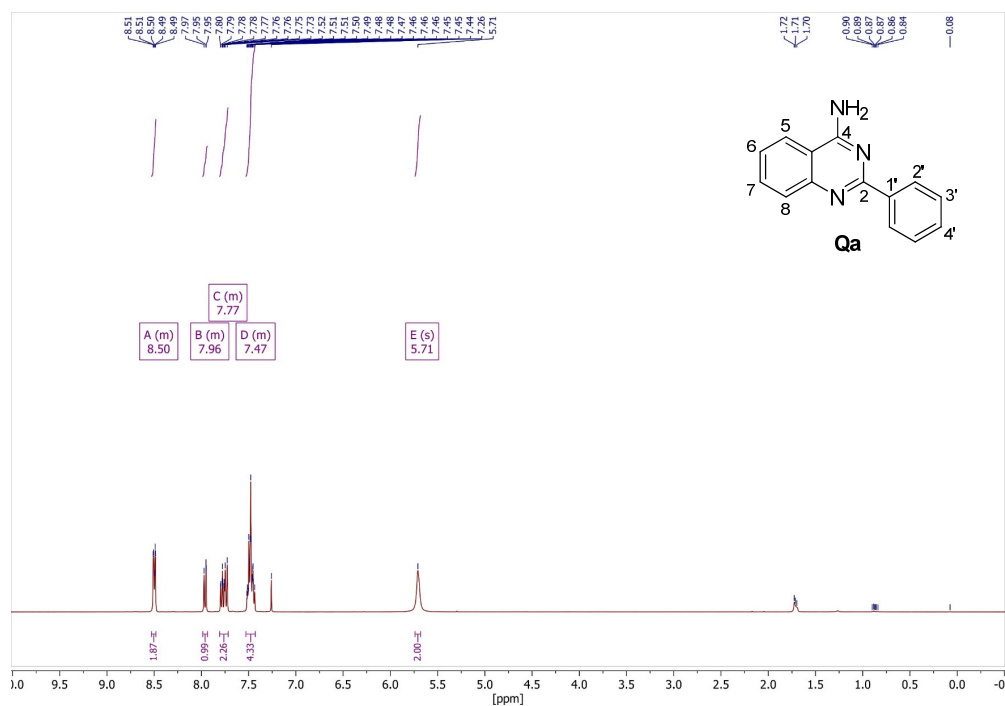

Figure S1. <sup>1</sup>H NMR spectrum of Qa in CDCl<sub>3</sub>.

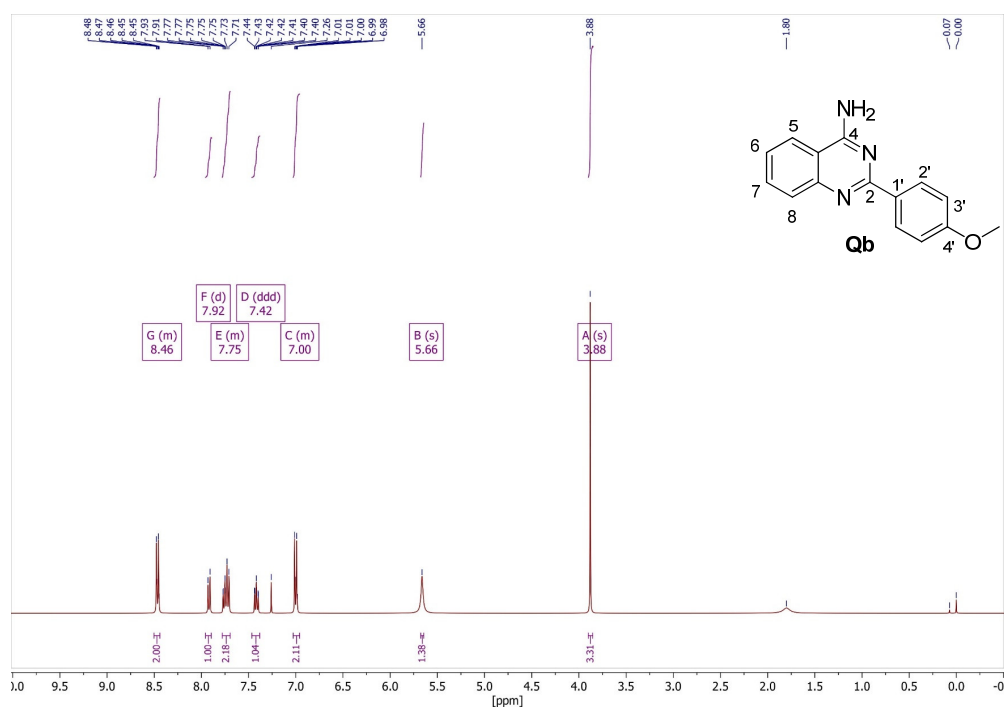

Figure S2. <sup>1</sup>H NMR spectrum of Qb in CDCl<sub>3</sub>.

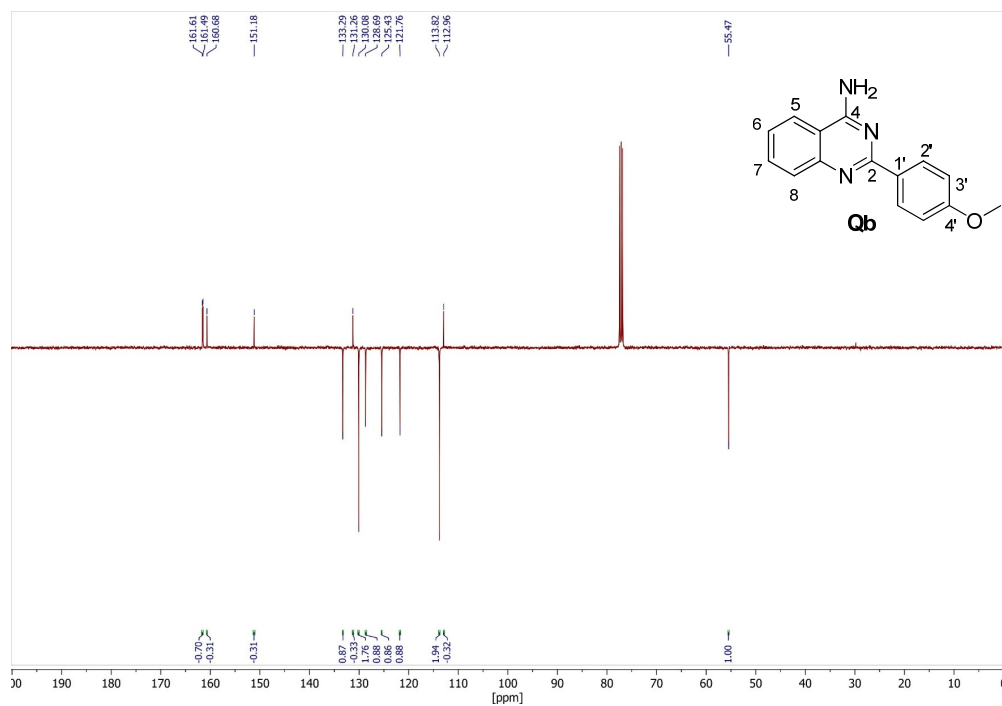

Figure S3. APT- $^{13}\text{C}\{^1\text{H}\}$  NMR spectrum of **Qb** in  $\text{CDCl}_3$ .

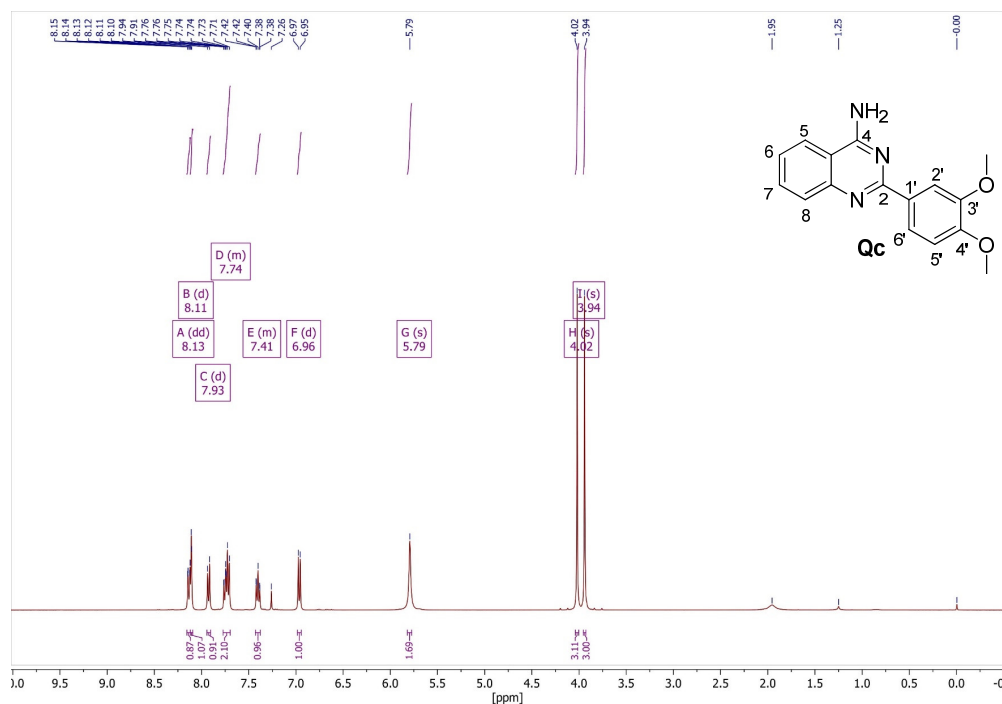

Figure S4.  $^1\text{H}$  NMR spectrum of **Qc** in  $\text{CDCl}_3$ .

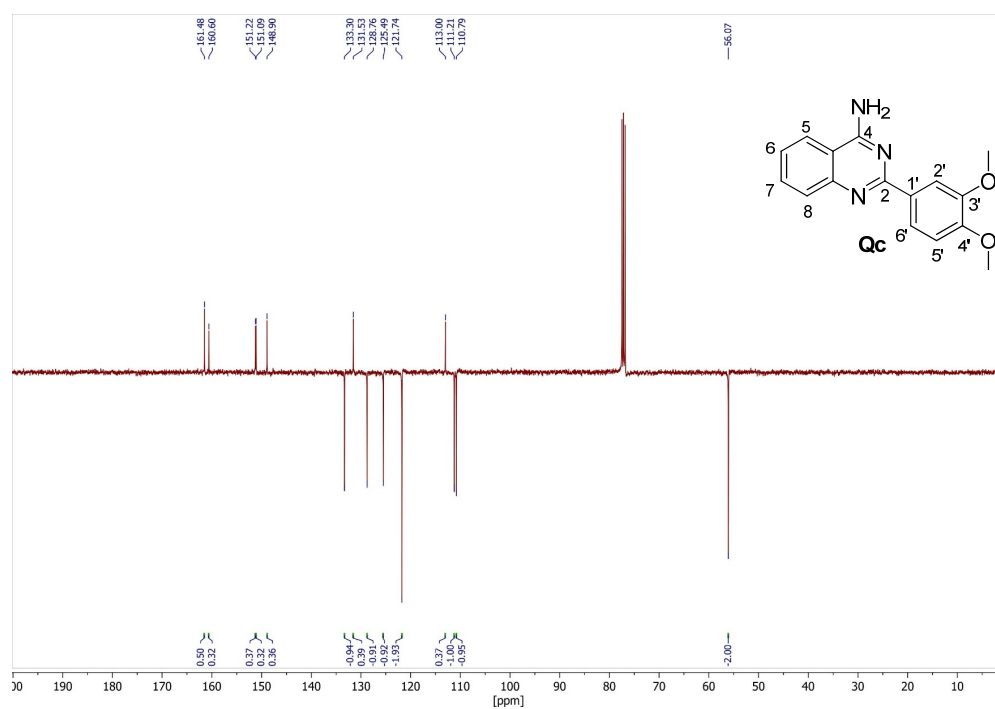

Figure S5. APT- $^{13}\text{C}\{^1\text{H}\}$  NMR spectrum of **Qc** in  $\text{CDCl}_3$ .

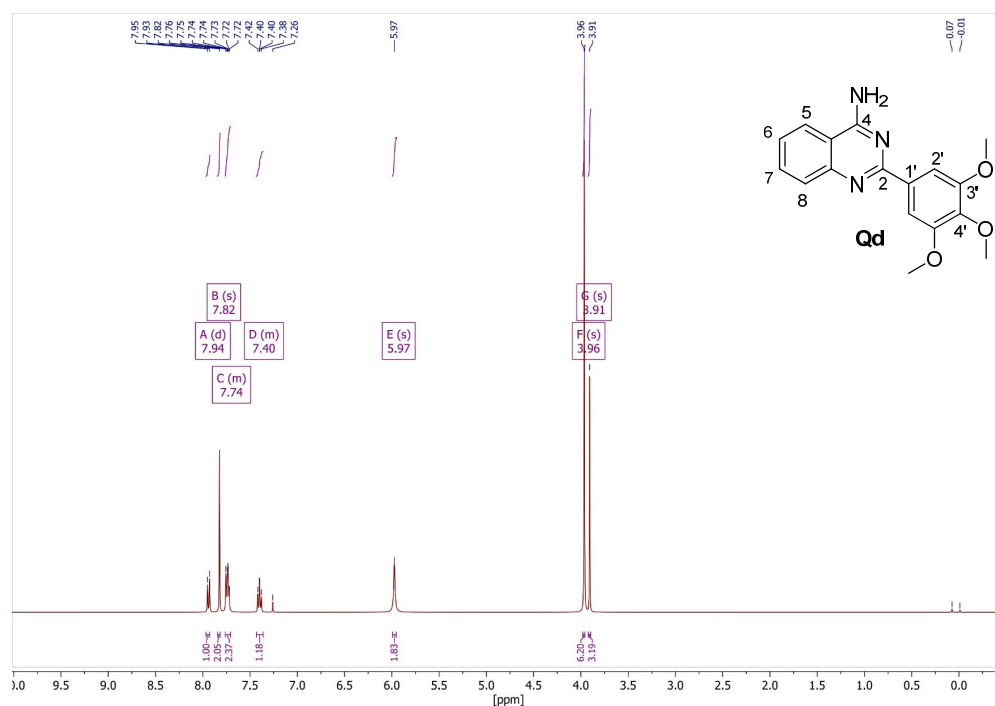

Figure S6.  $^1\text{H}$  NMR spectrum of **Qd** in  $\text{CDCl}_3$ .



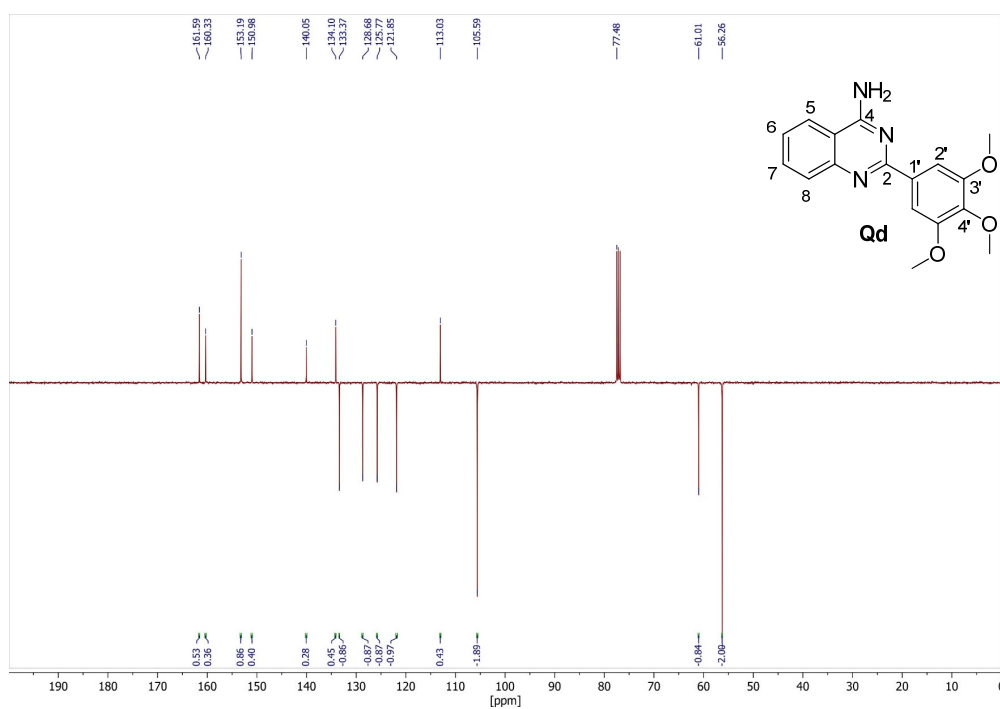

Figure S7. APT- $^{13}\text{C}\{^1\text{H}\}$  NMR spectrum of **Qd** in  $\text{CDCl}_3$ .

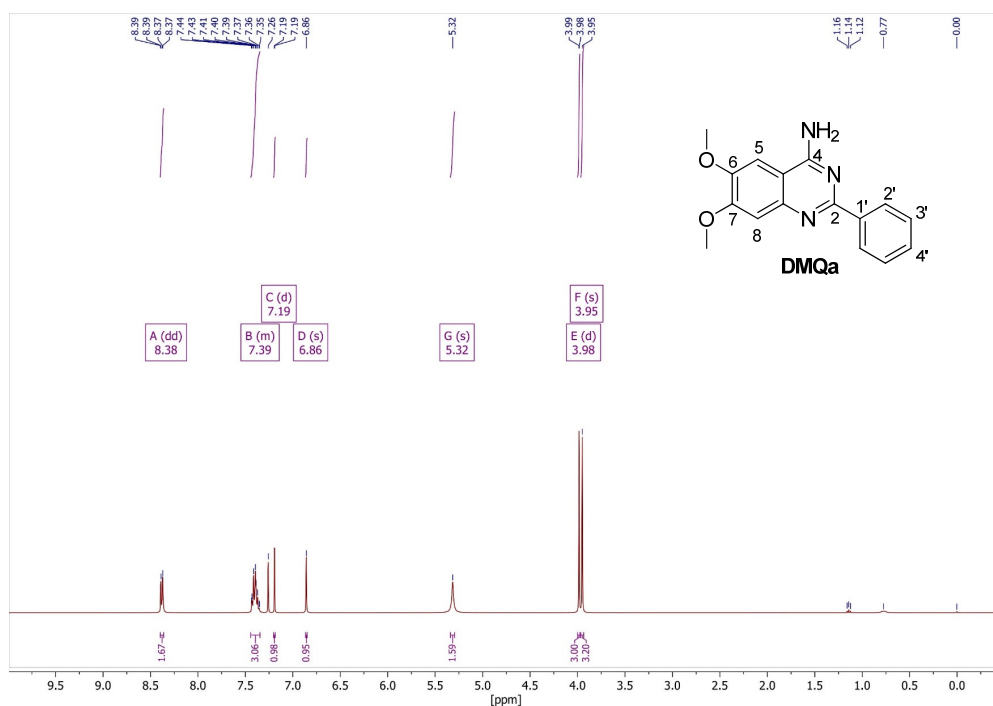

Figure S8.  $^1\text{H}$  NMR spectrum of **DMQa** in  $\text{CDCl}_3$ .

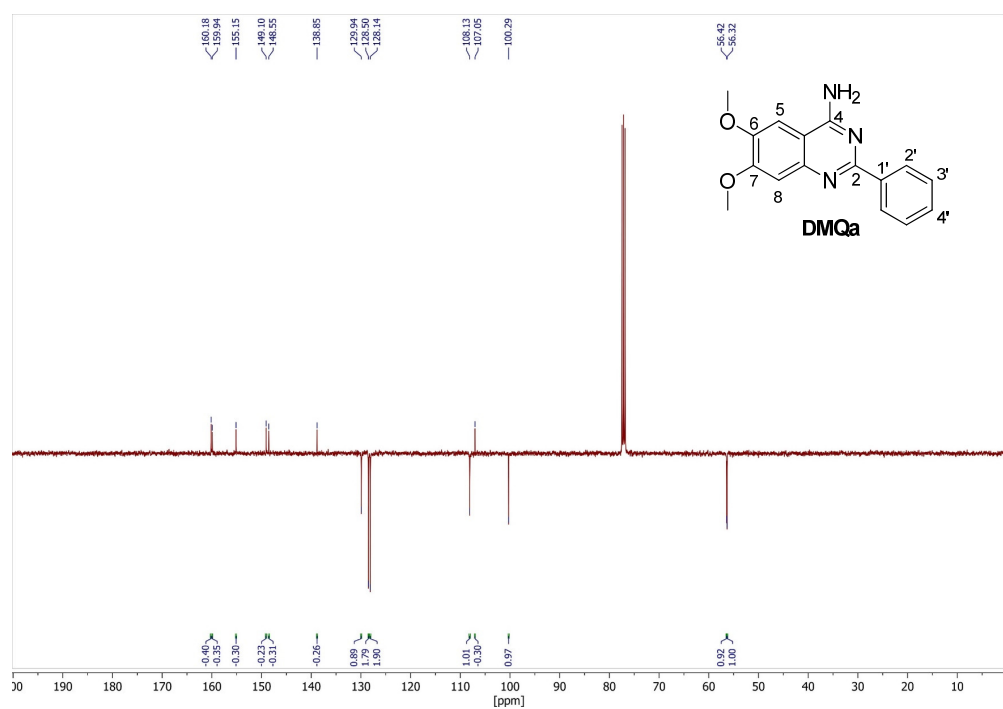

Figure S9. APT- $^{13}\text{C}\{^1\text{H}\}$  NMR spectrum of DMQa in  $\text{CDCl}_3$ .

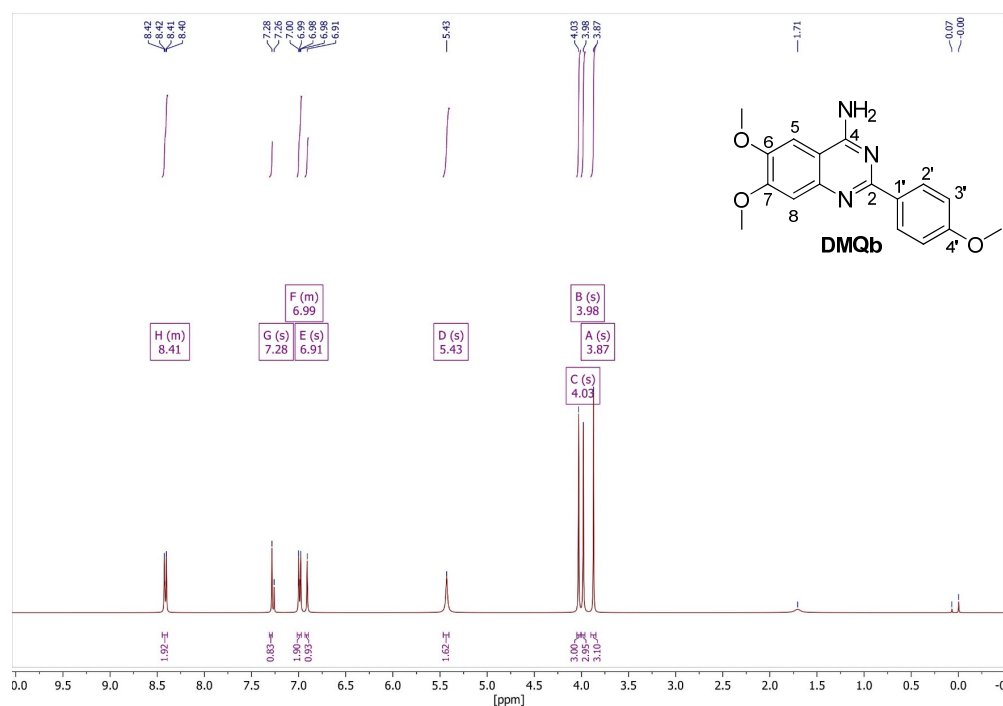

Figure S10.  $^1\text{H}$  NMR spectrum of DMQb in  $\text{CDCl}_3$ .

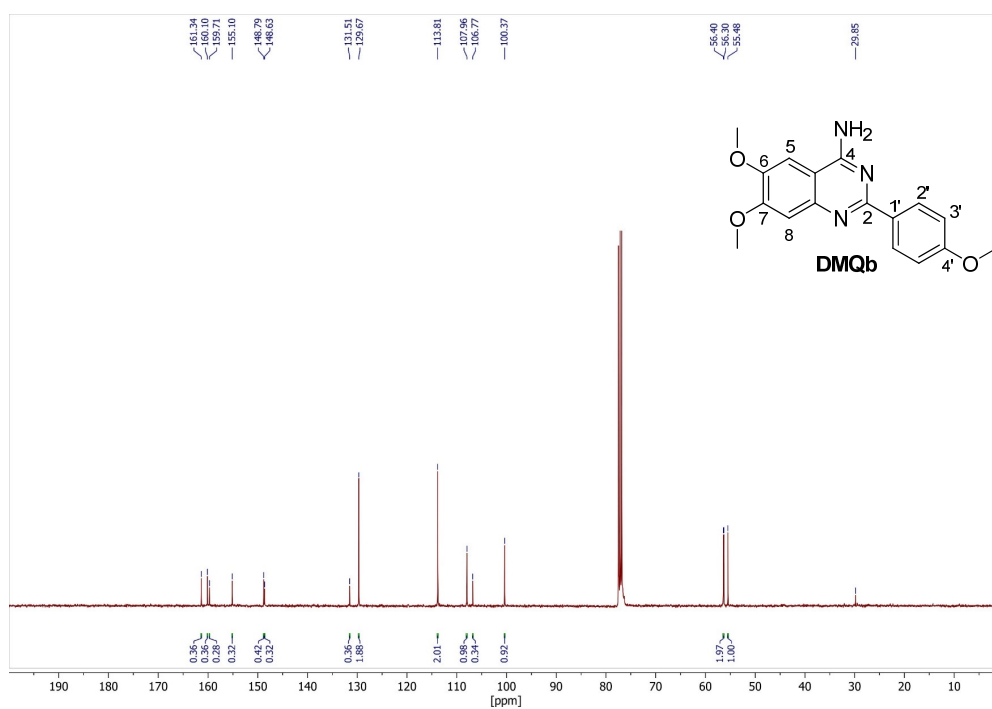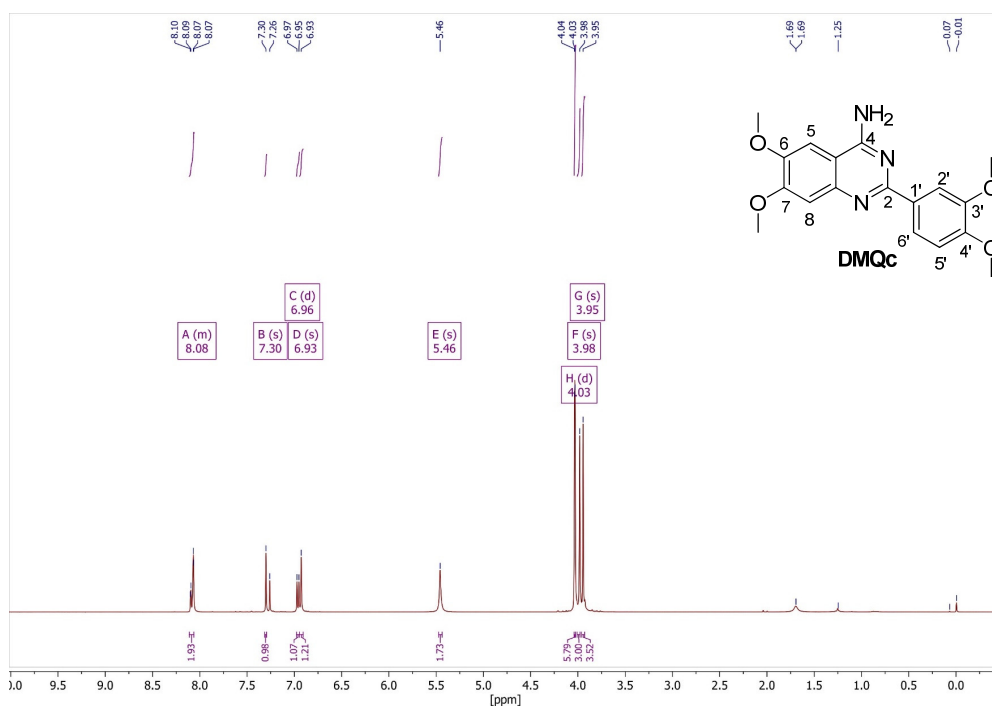

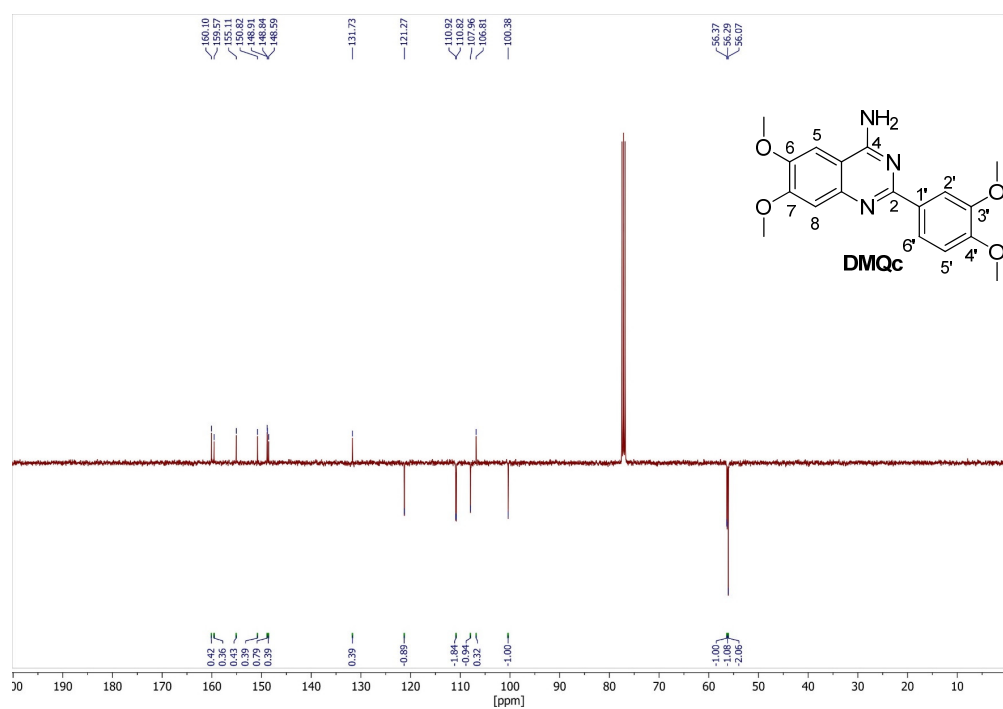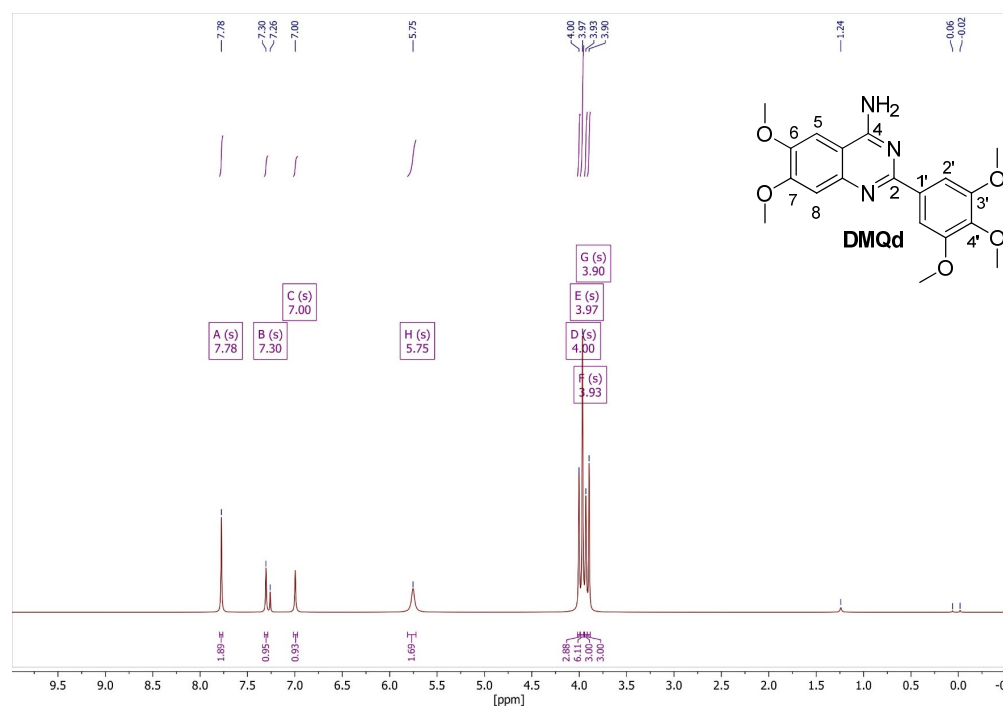

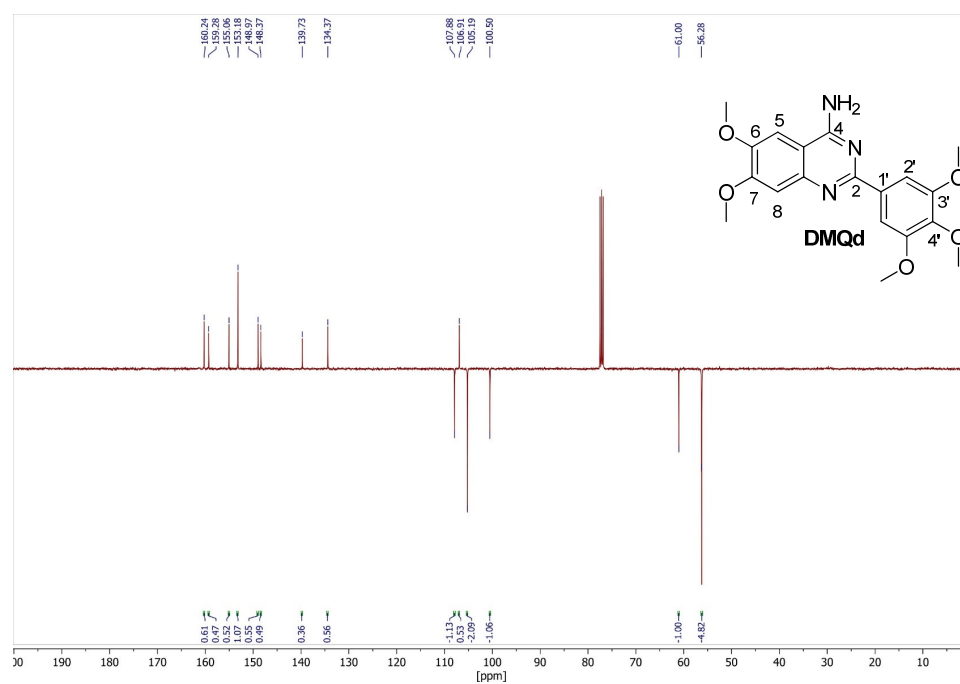

**Figure S15.** APT-<sup>13</sup>C{<sup>1</sup>H} NMR spectrum of **DMQd** in CDCl<sub>3</sub>.

## 2. NMR spectra of *N*-carboranyl quinazoline-4-amines QCa-d and DMQCa-d

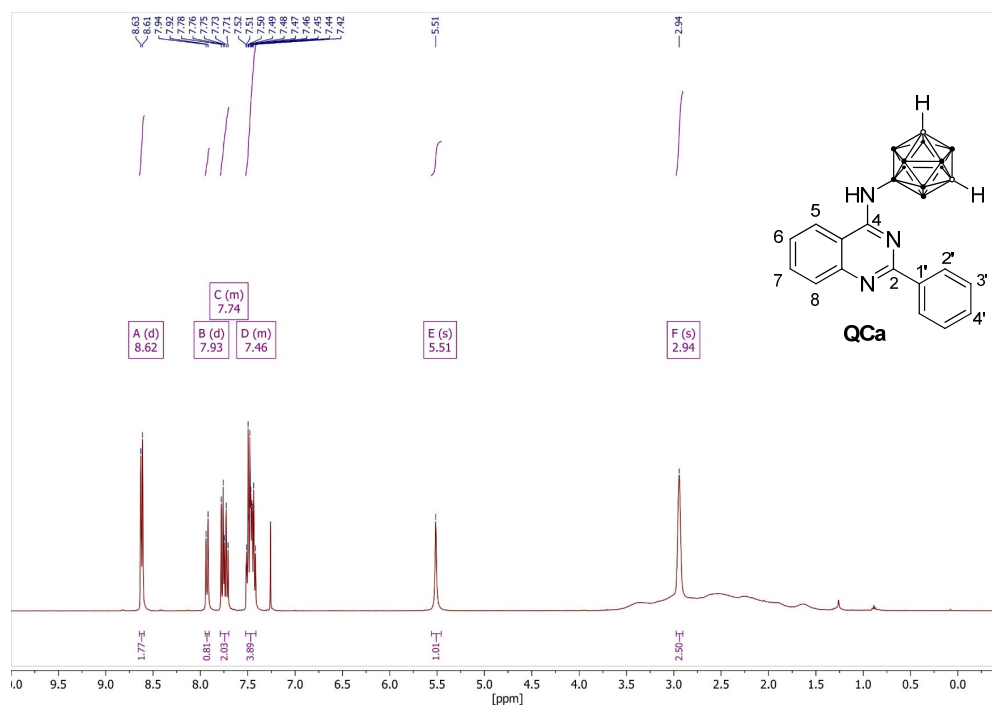

**Figure S16.**  $^1\text{H}$  NMR spectrum of **QCa** in  $\text{CDCl}_3$ .

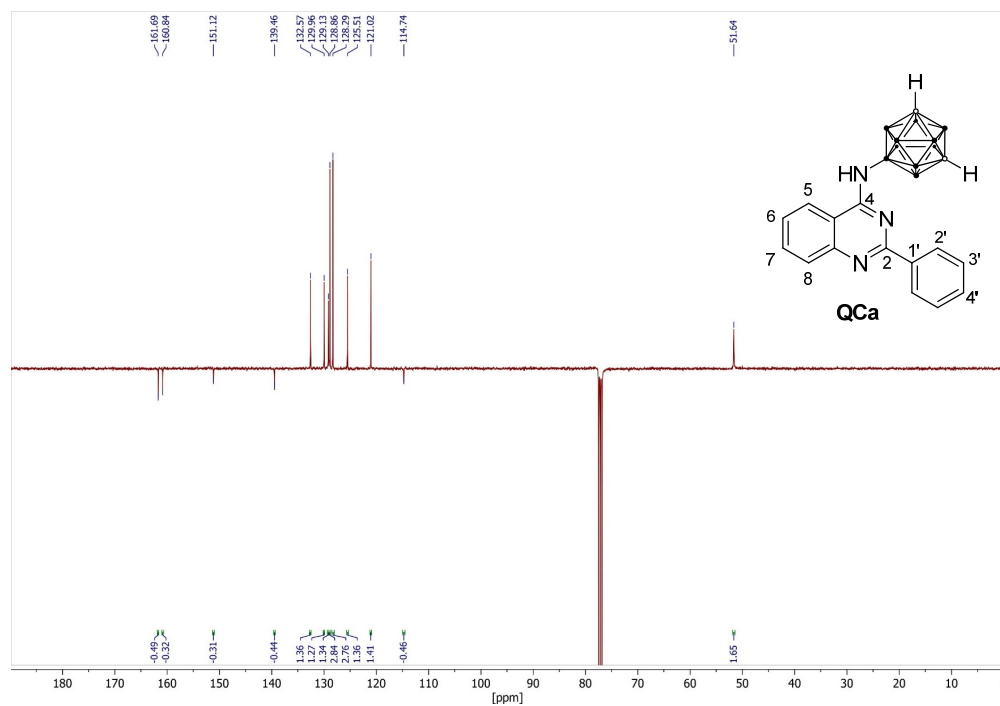

**Figure S17.** APT- $^{13}\text{C}\{^1\text{H}\}$  NMR spectrum of QCa in  $\text{CDCl}_3$ .

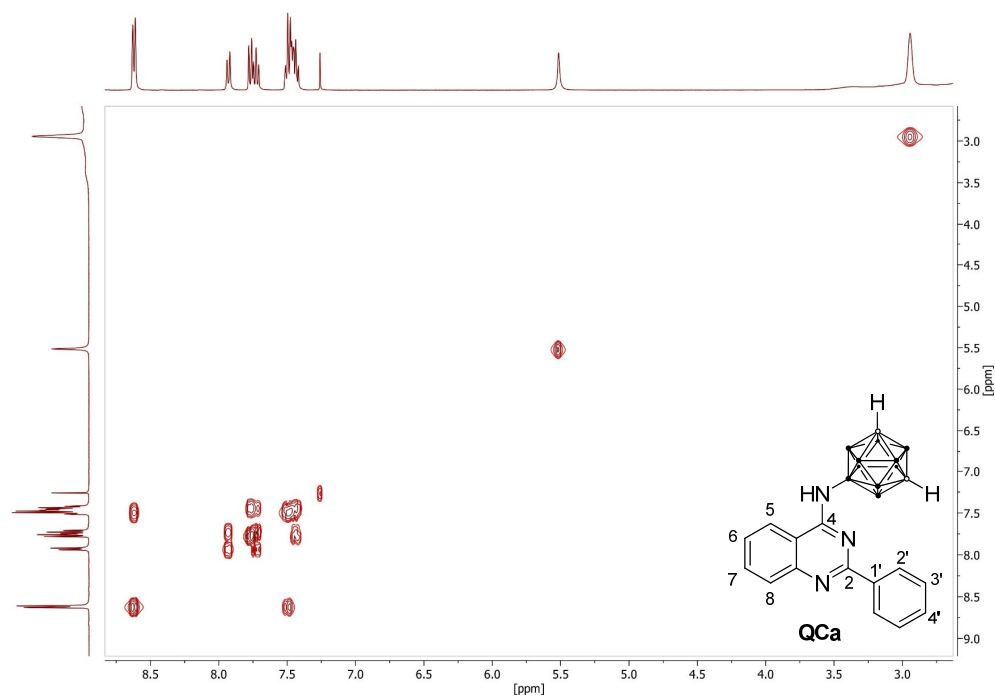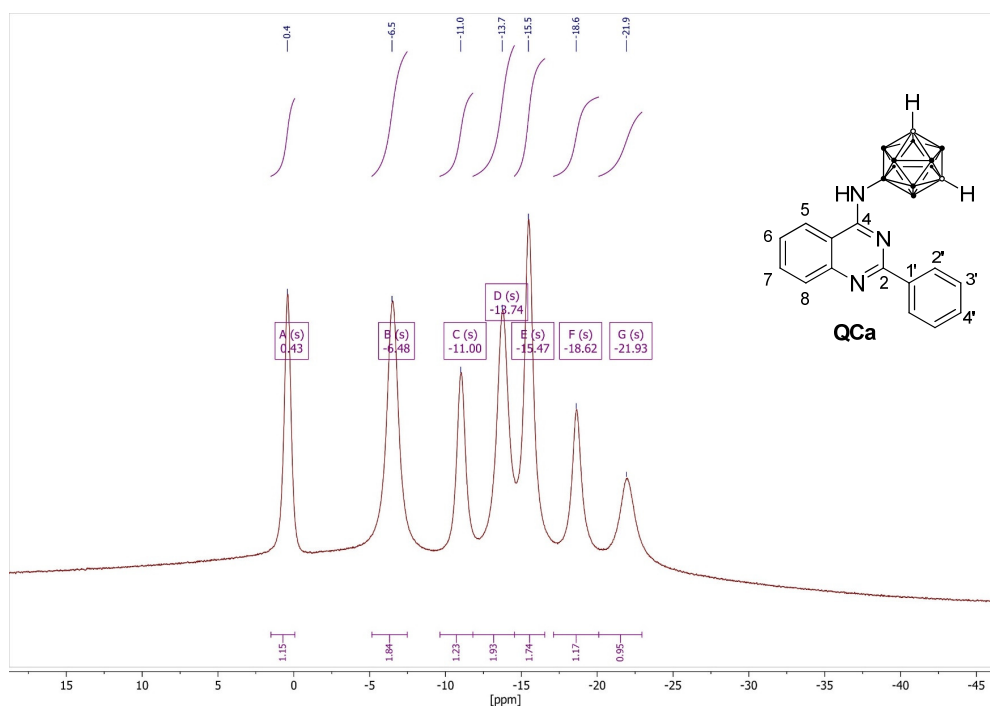

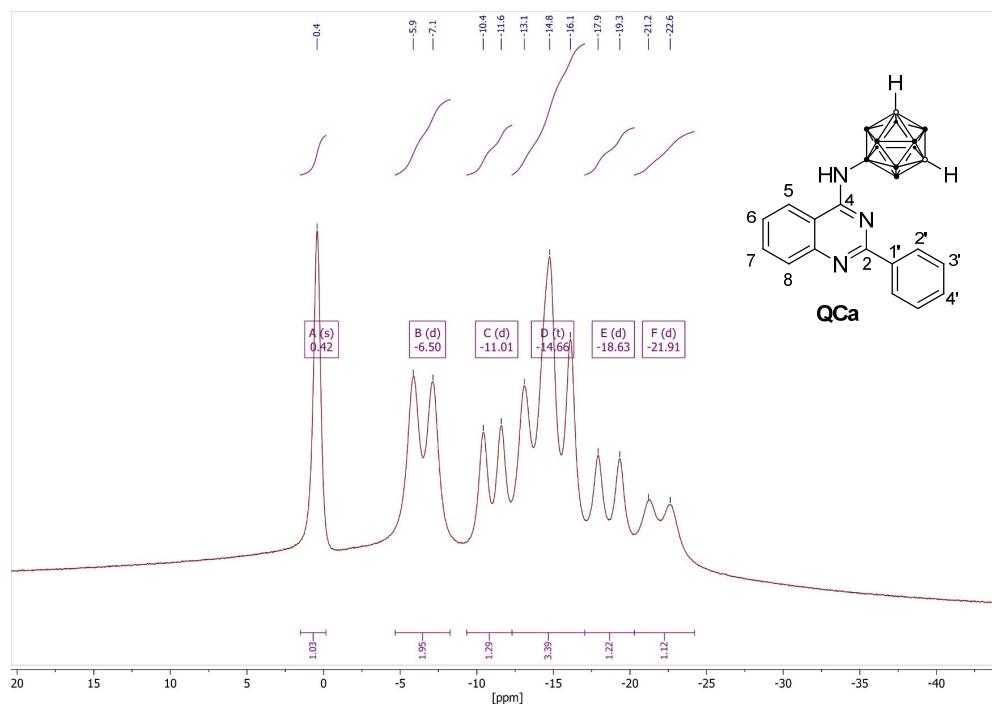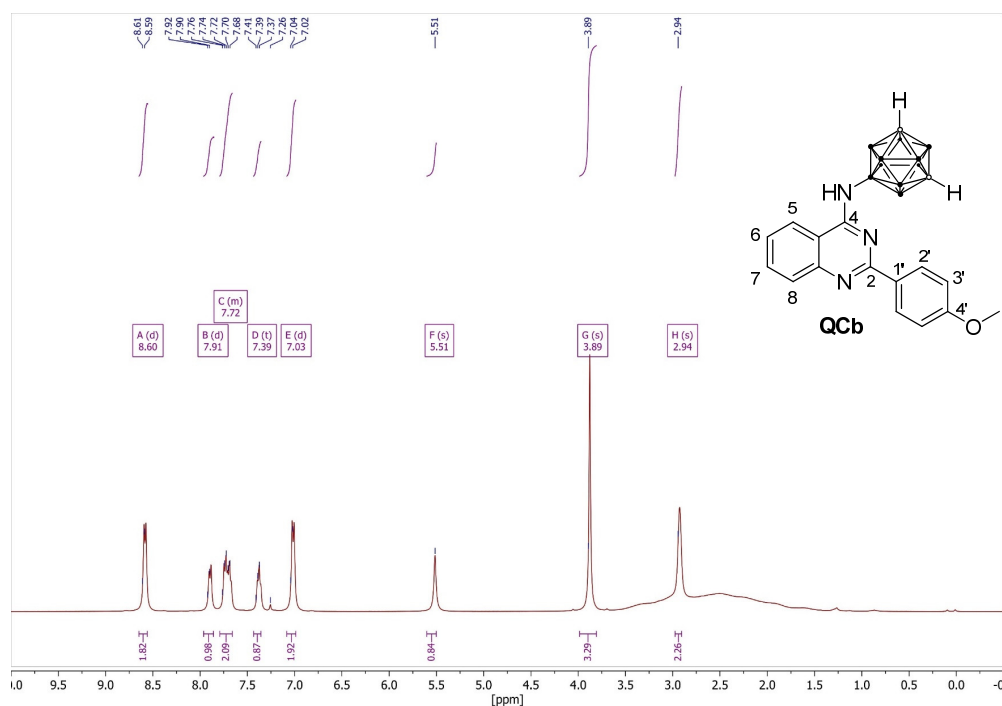



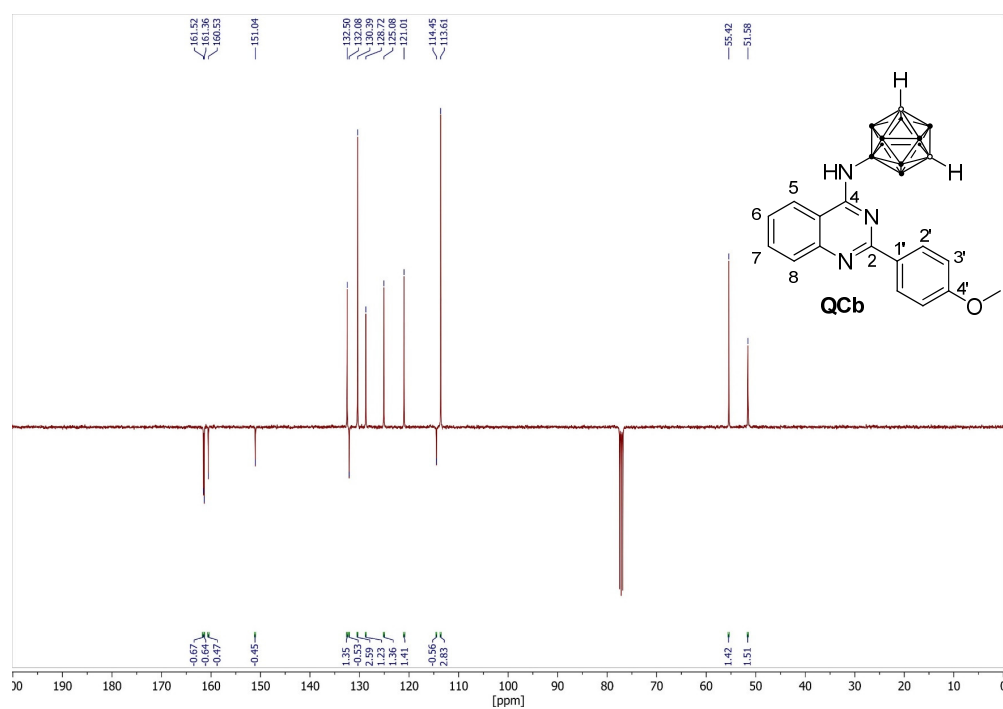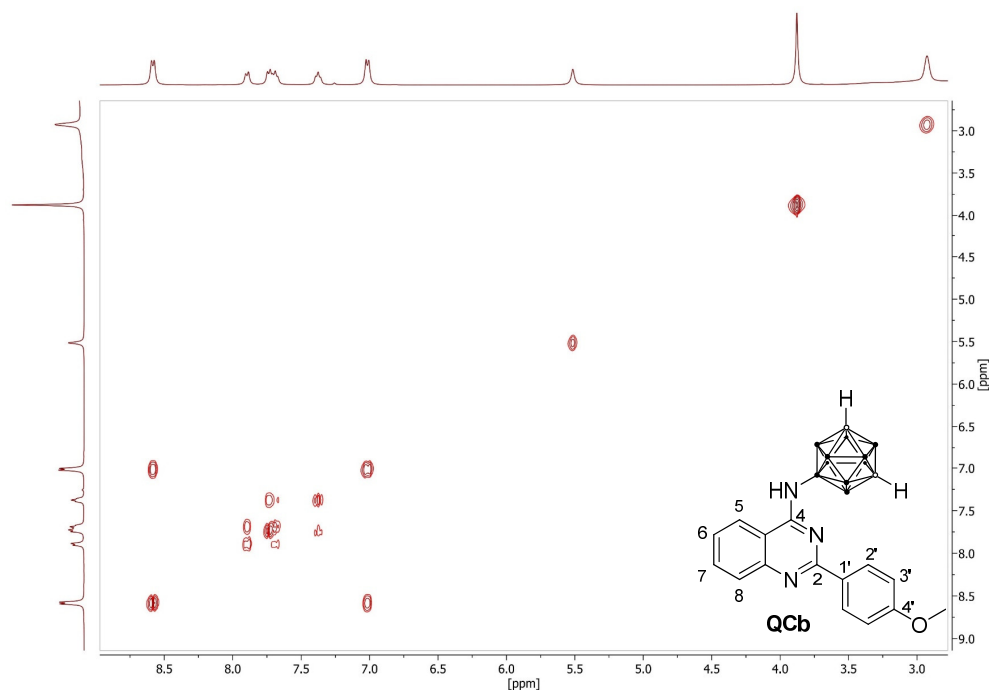

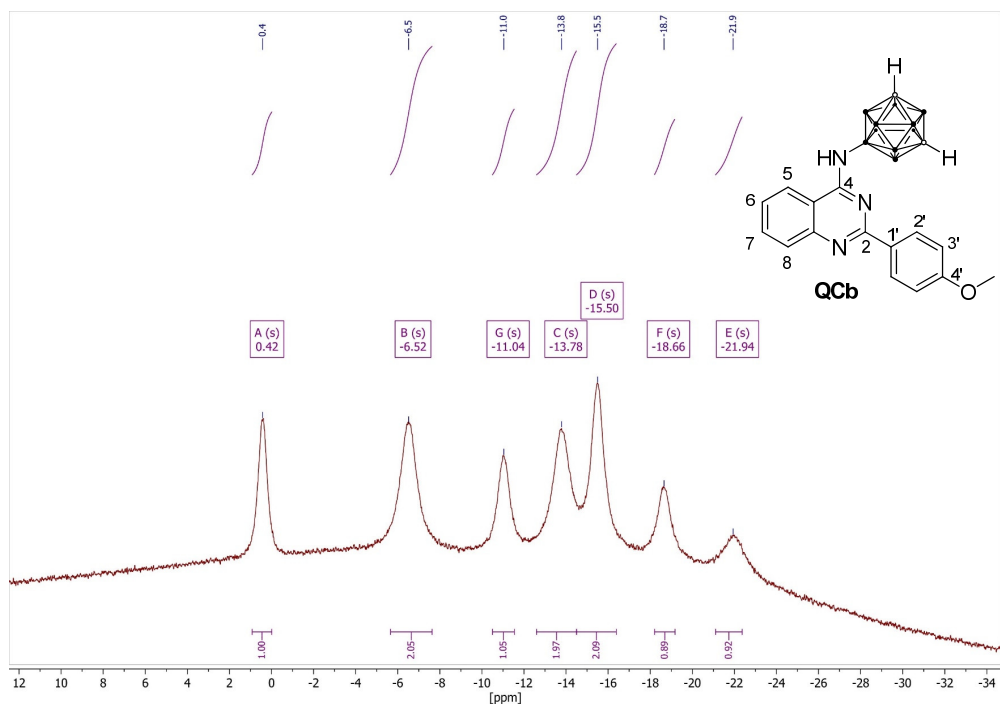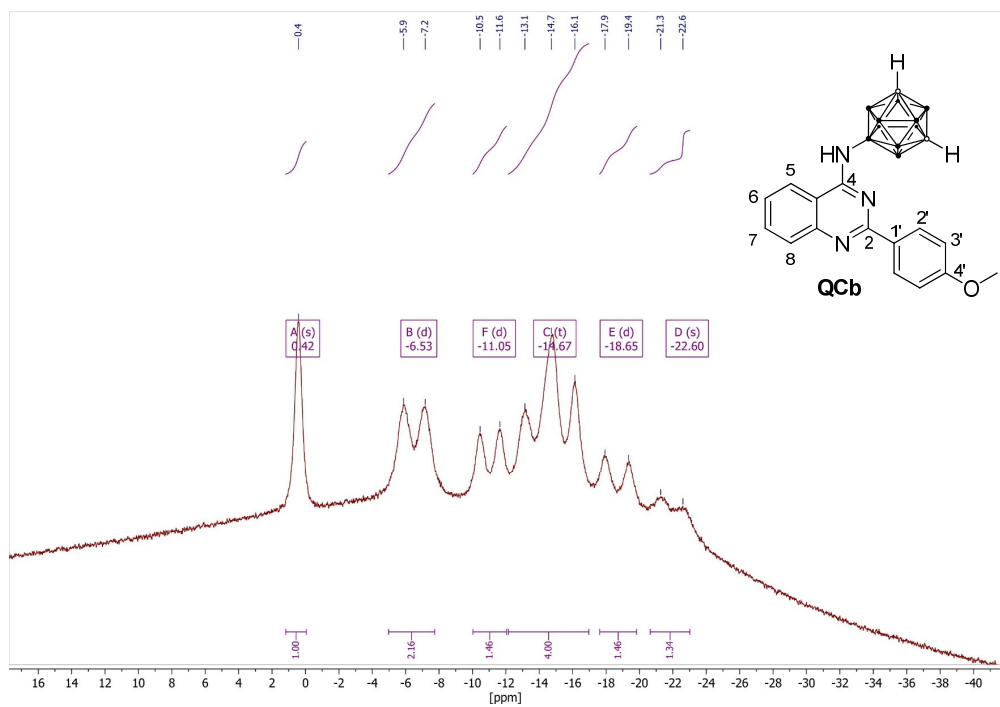

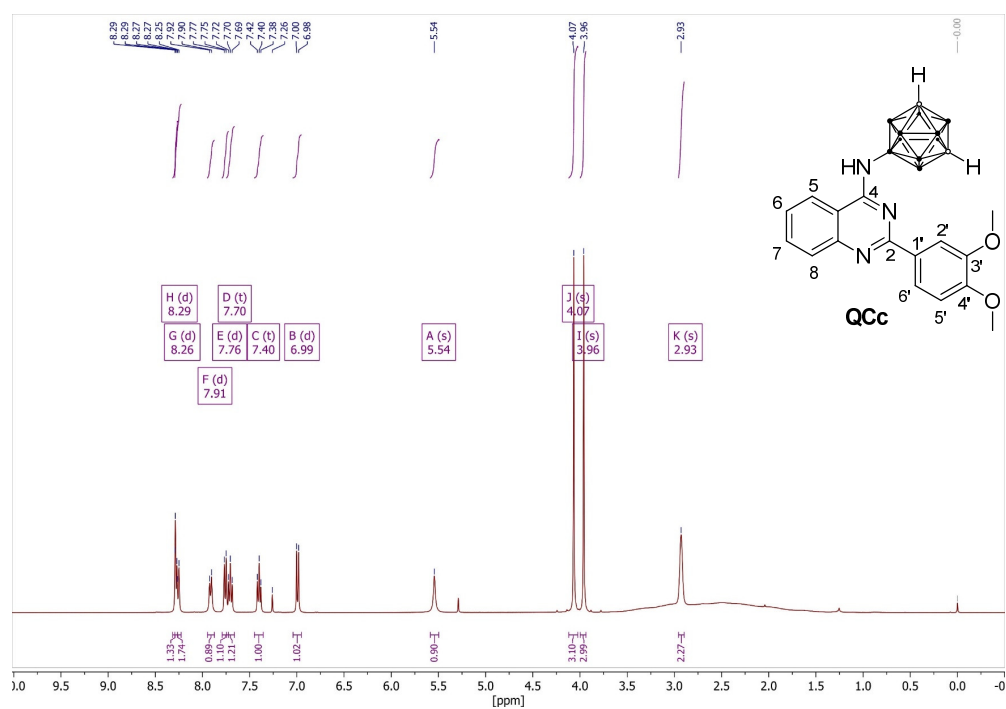

Figure S26. <sup>1</sup>H NMR spectrum of QCc in CDCl<sub>3</sub>.

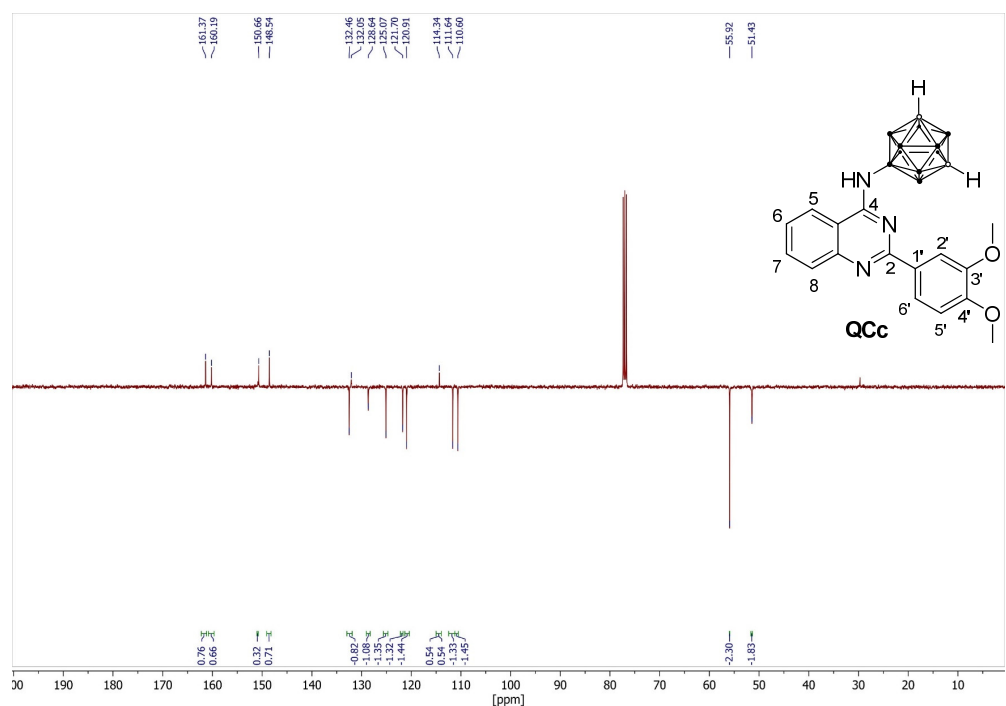

Figure S27. APT-<sup>13</sup>C{<sup>1</sup>H} NMR spectrum of QCc in CDCl<sub>3</sub>.

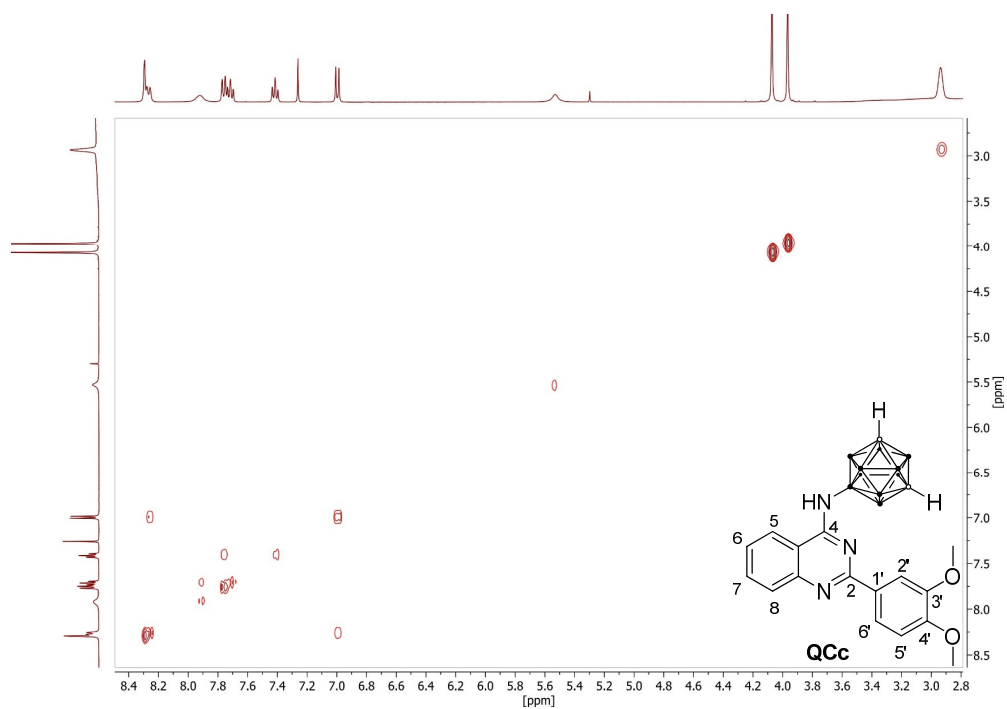

Figure S28.  $^1\text{H}$ -COSY NMR spectrum of QCc in  $\text{CDCl}_3$ .

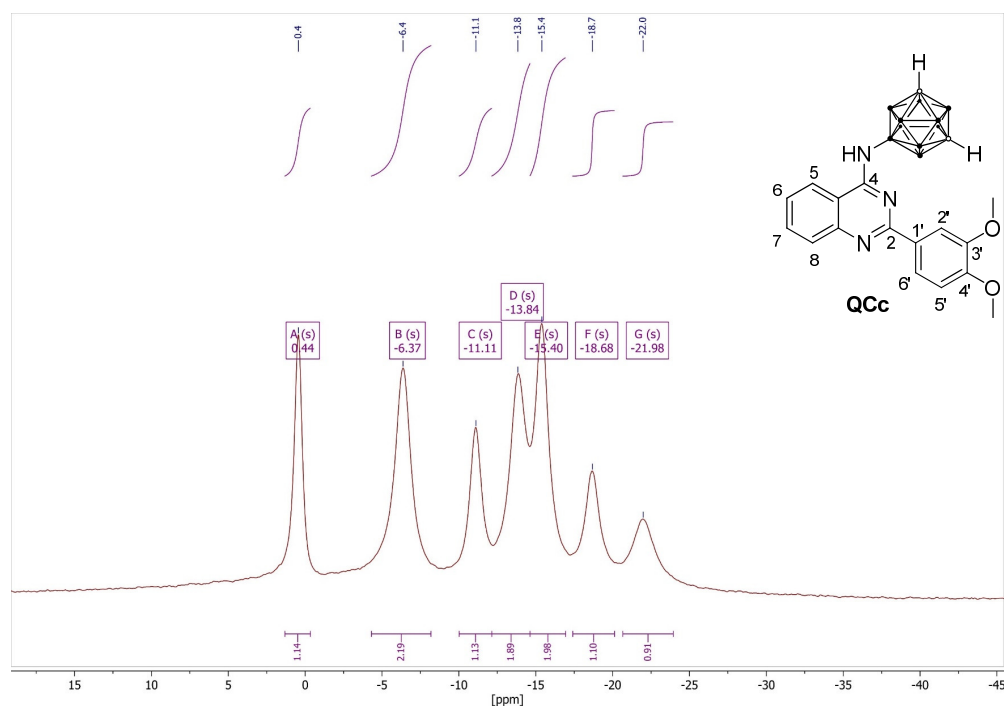

Figure S29.  $^{11}\text{B}\{^1\text{H}\}$  NMR spectrum of QCc in  $\text{CDCl}_3$ .

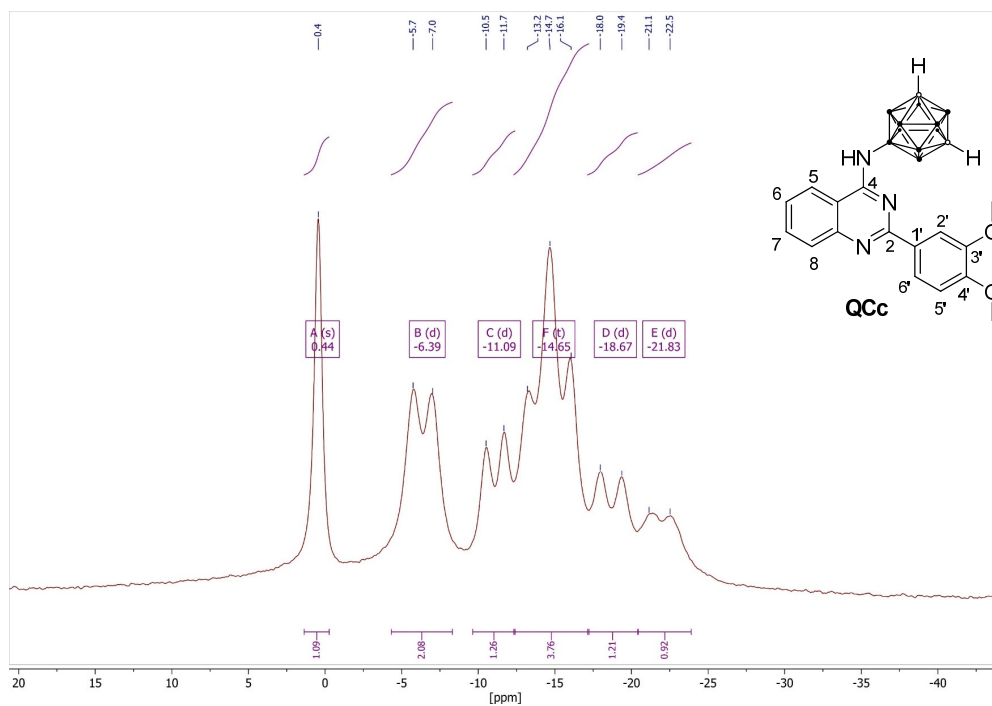

Figure S30. <sup>11</sup>B NMR spectrum of QCc in CDCl<sub>3</sub>.

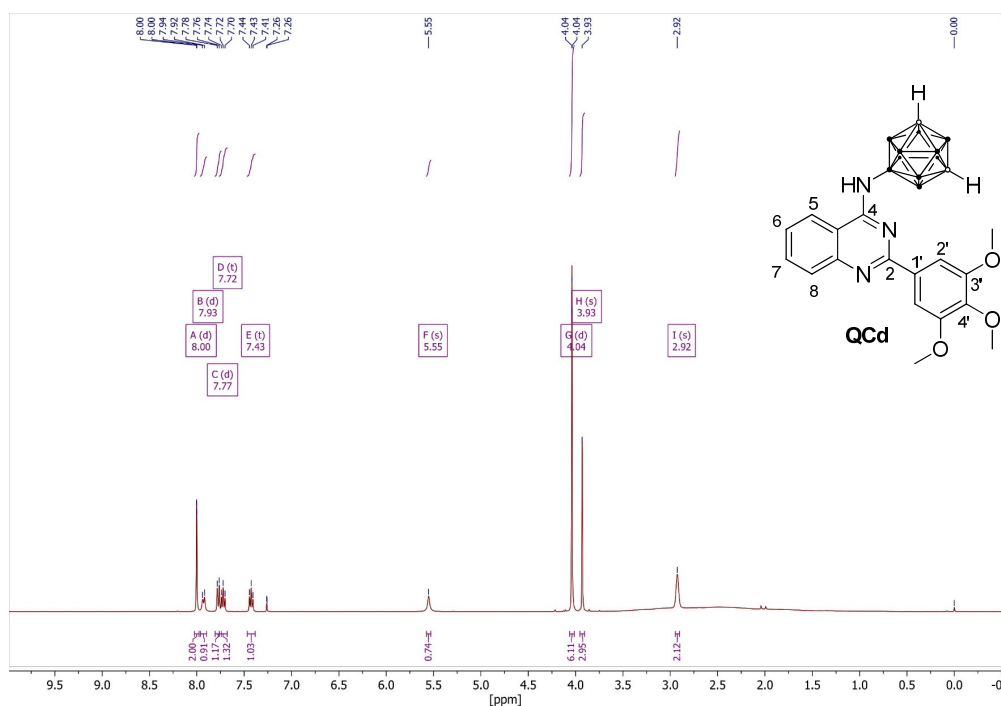

Figure S31. <sup>1</sup>H NMR spectrum of QCd in CDCl<sub>3</sub>.

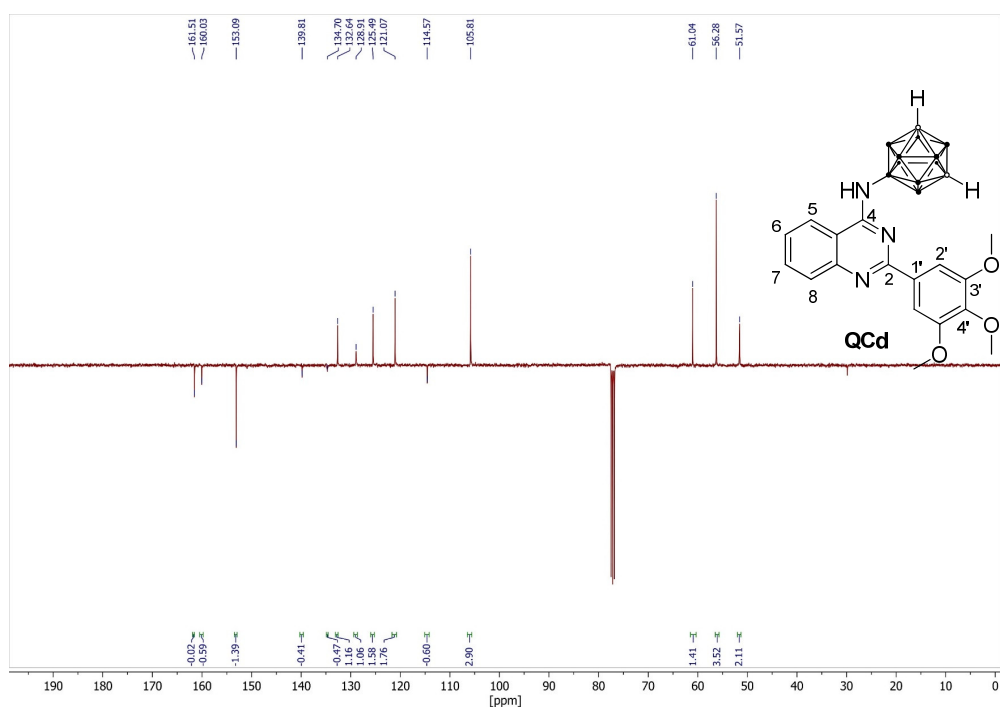

Figure S32. APT- $^{13}\text{C}\{^1\text{H}\}$  NMR spectrum of Qcd in  $\text{CDCl}_3$ .

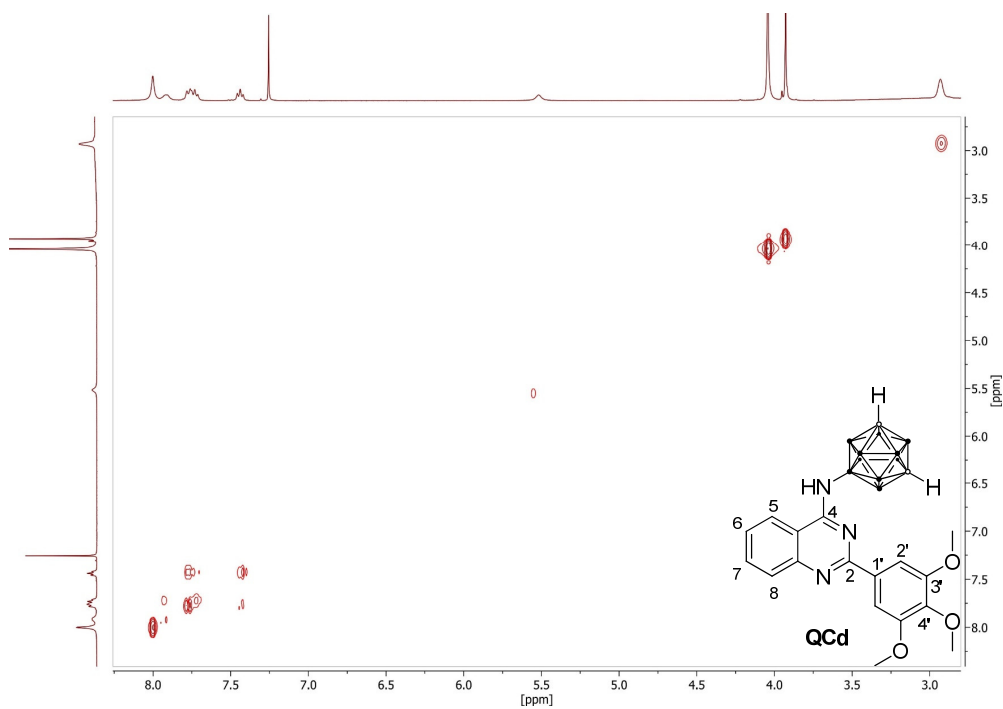

Figure S33.  $^1\text{H}$ -COSY NMR spectrum of Qcd in  $\text{CDCl}_3$ .

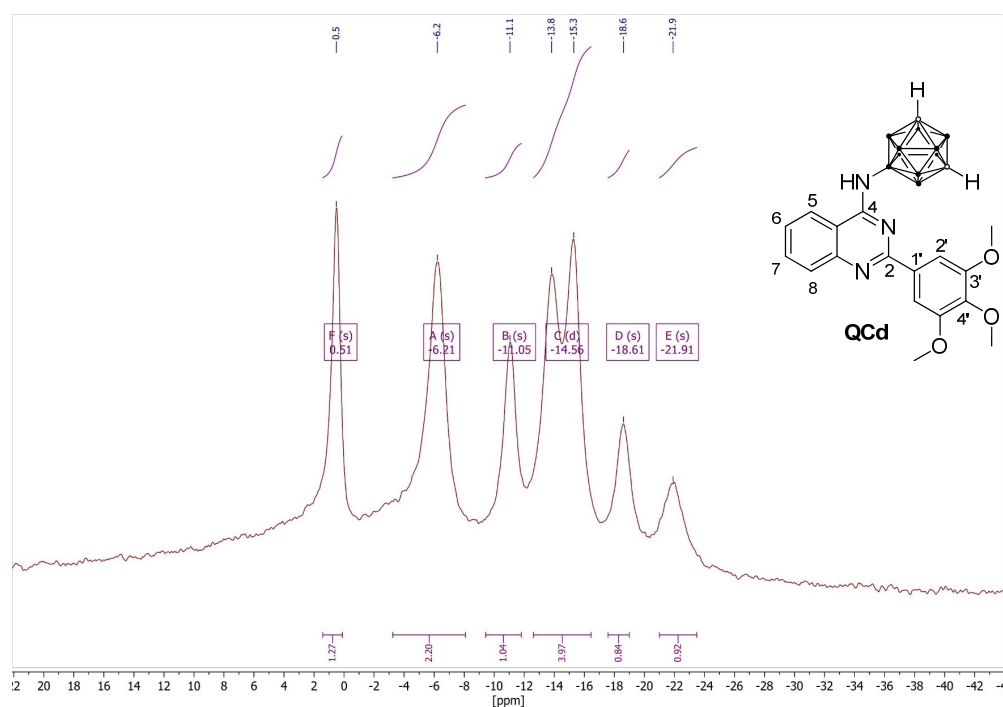

Figure S34.  $^{11}\text{B}\{^1\text{H}\}$  NMR spectrum of QCd in  $\text{CDCl}_3$ .

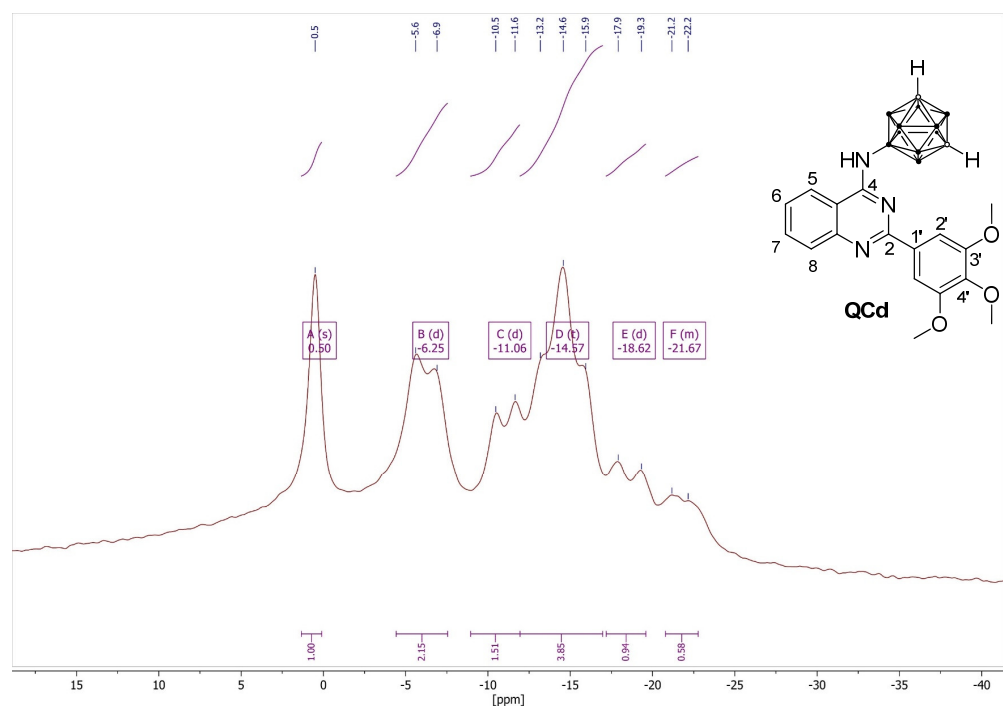

Figure S35.  $^{11}\text{B}$  NMR spectrum of QCd in  $\text{CDCl}_3$ .

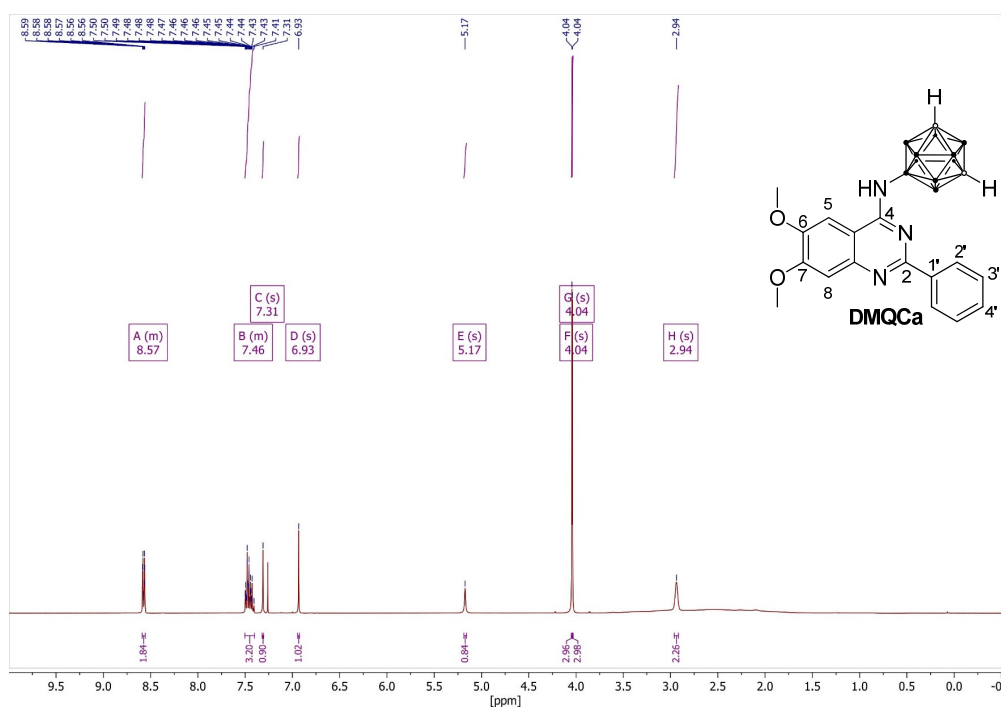

Figure S36.  $^1\text{H}$  NMR spectrum of DMQCa in  $\text{CDCl}_3$ .

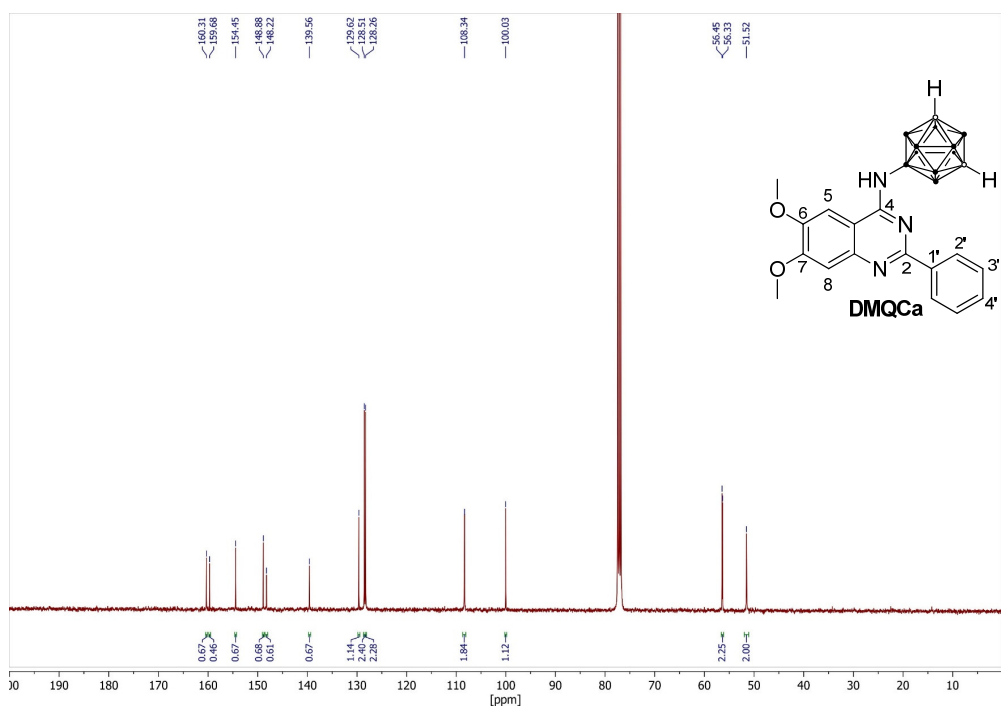

Figure S37.  $^{13}\text{C}\{^1\text{H}\}$  NMR spectrum of DMQCa in  $\text{CDCl}_3$ .



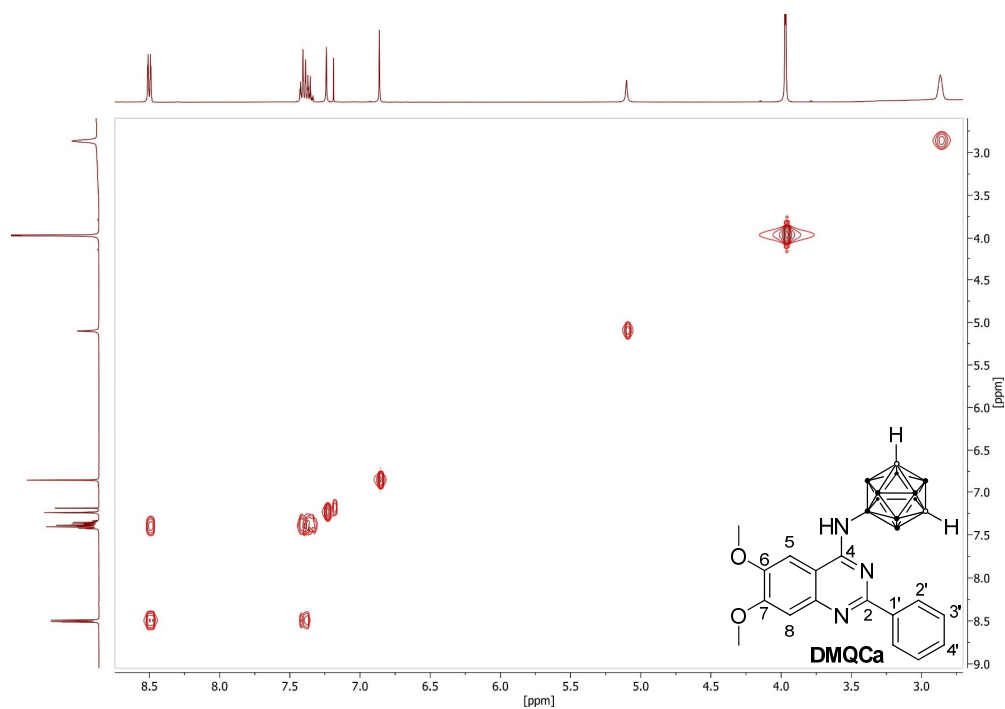

Figure S38.  $^1\text{H}$ -COSY NMR spectrum of DMQCa in  $\text{CDCl}_3$ .

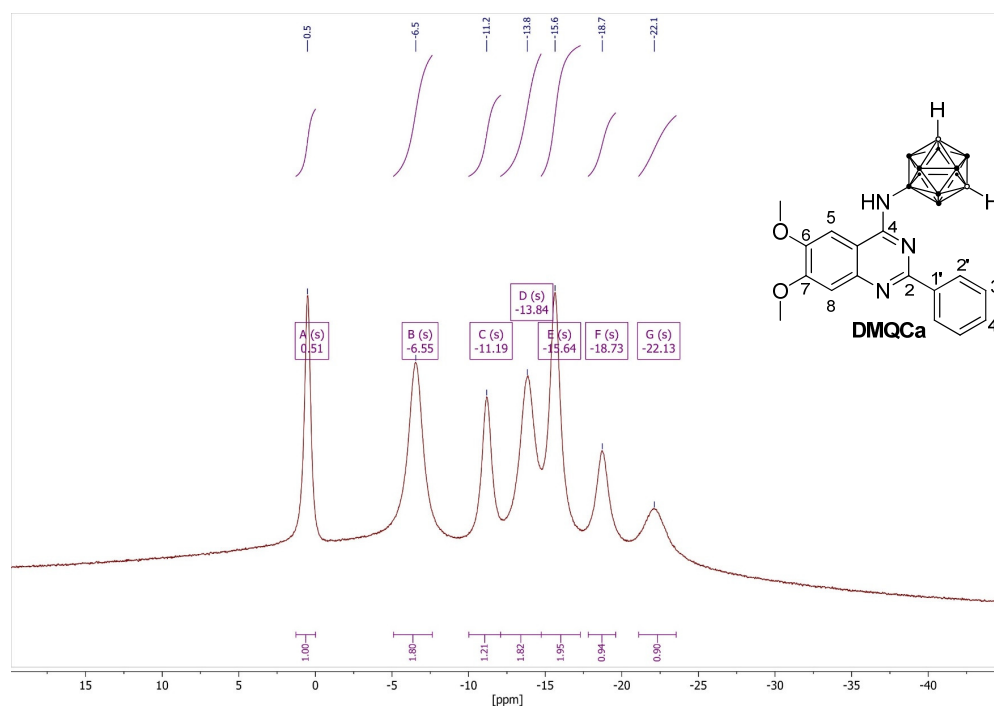

Figure S39.  $^{11}\text{B}\{^1\text{H}\}$  NMR spectrum of DMQCa in  $\text{CDCl}_3$ .

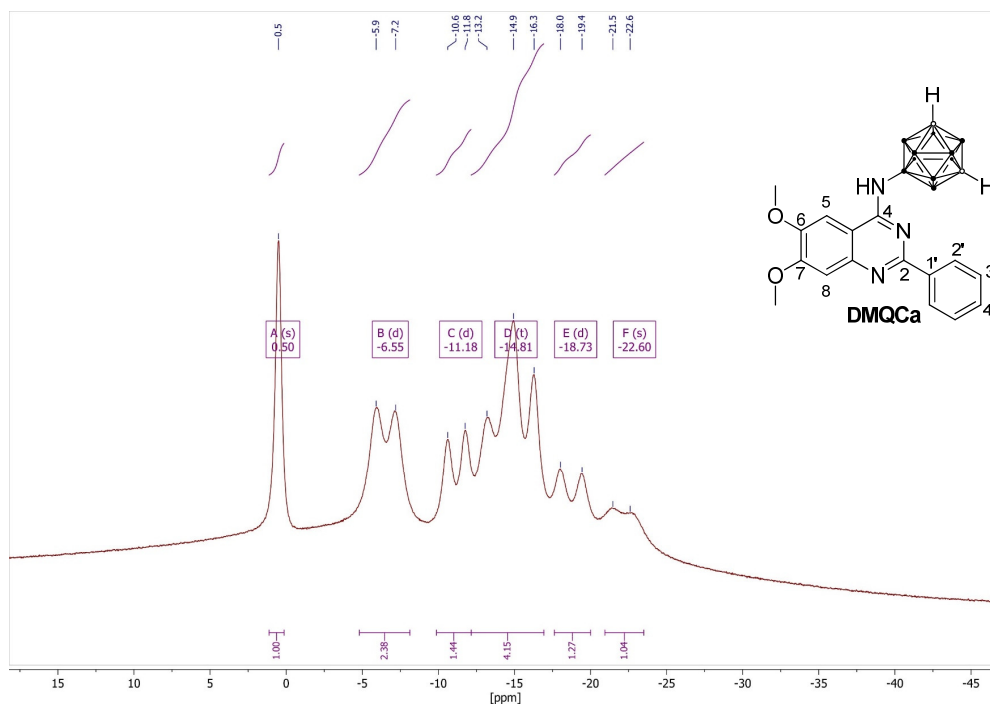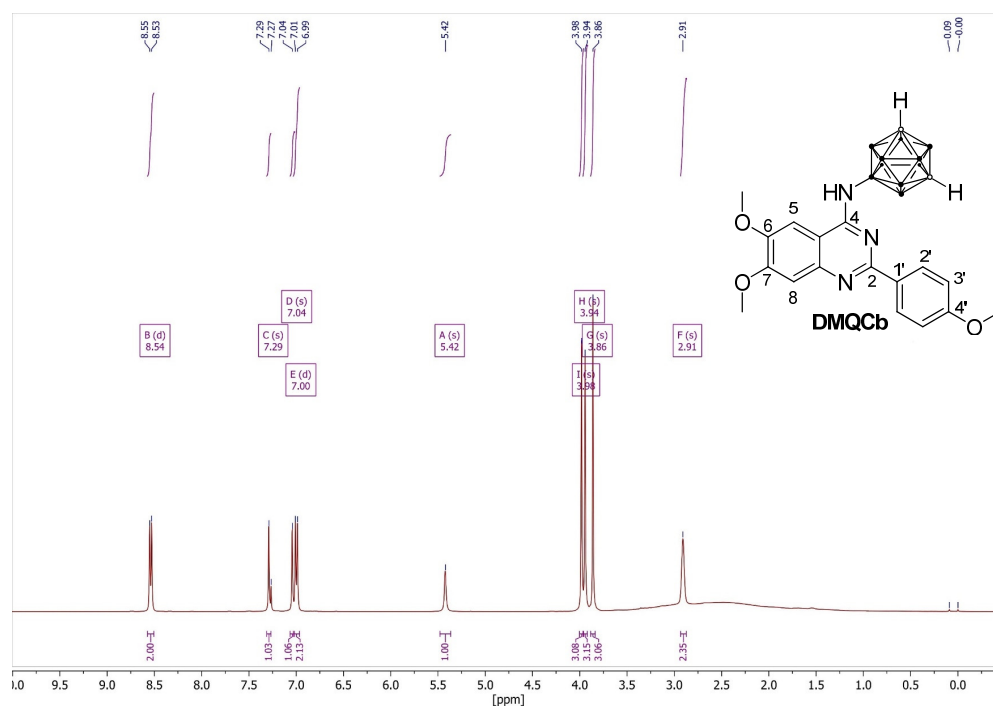

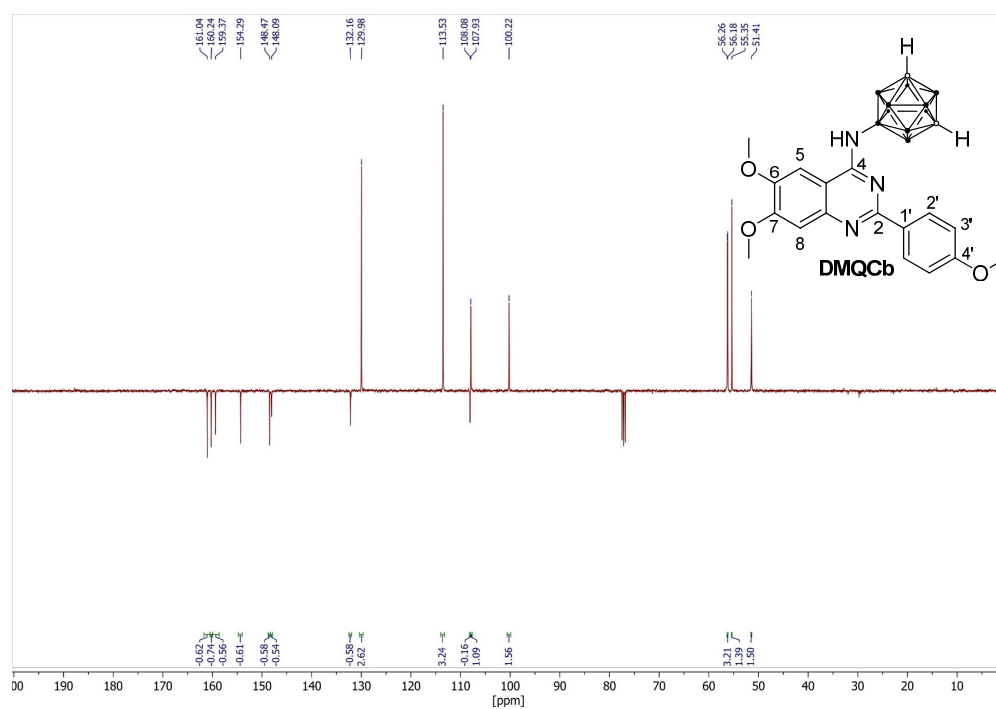

Figure S42. APT- $^{13}\text{C}\{^1\text{H}\}$  NMR spectrum of DMQCb in  $\text{CDCl}_3$ .

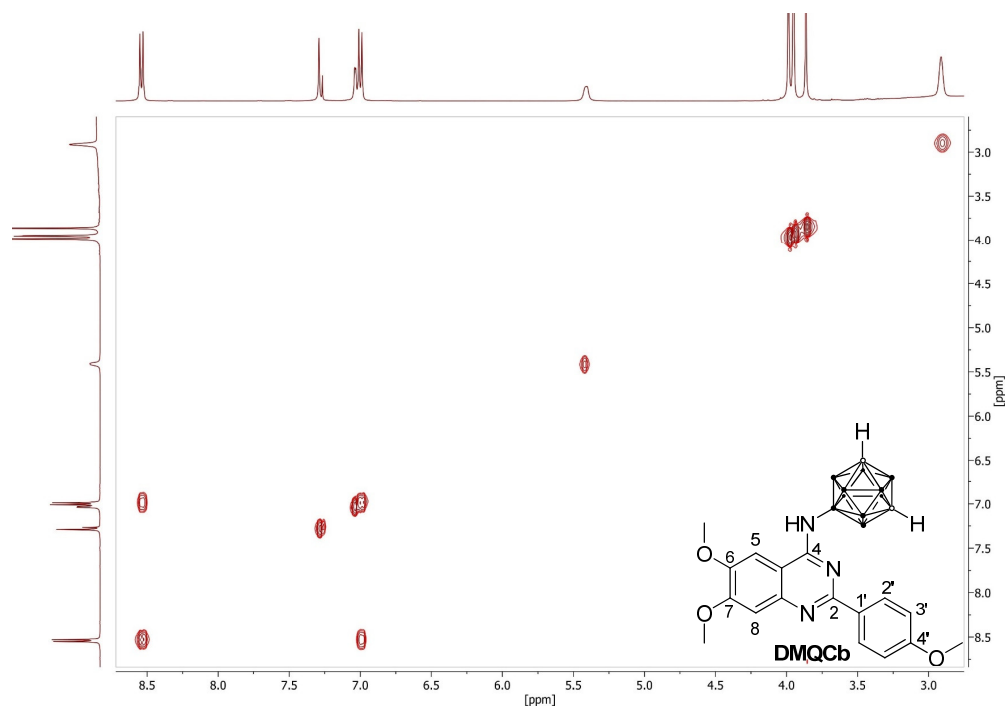

Figure S43.  $^1\text{H}$ -COSY NMR spectrum of DMQCb in  $\text{CDCl}_3$ .

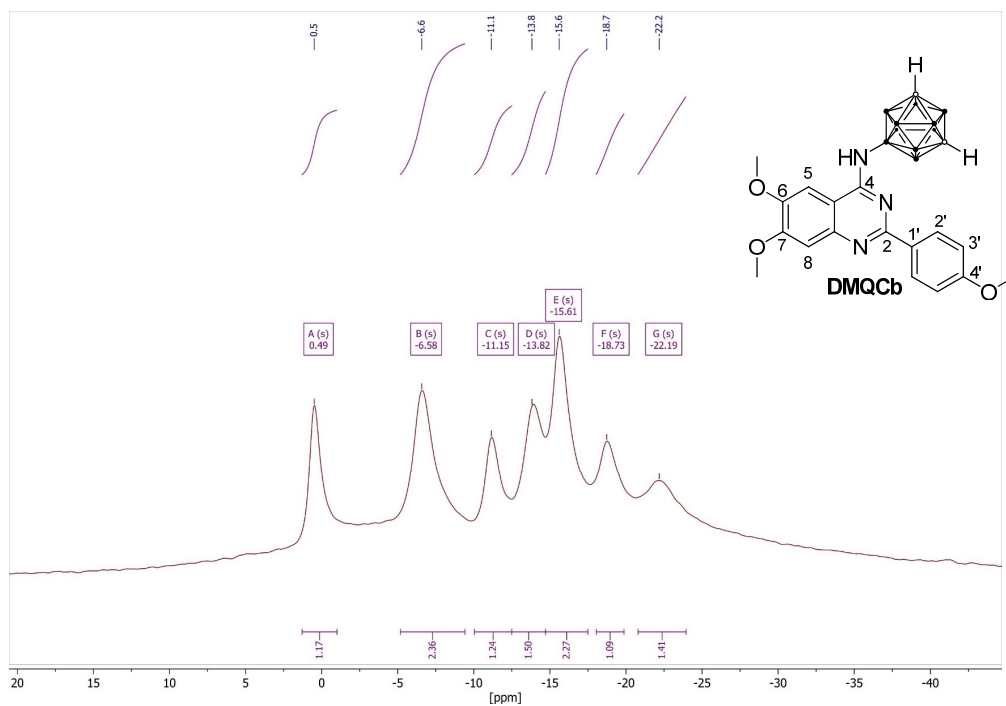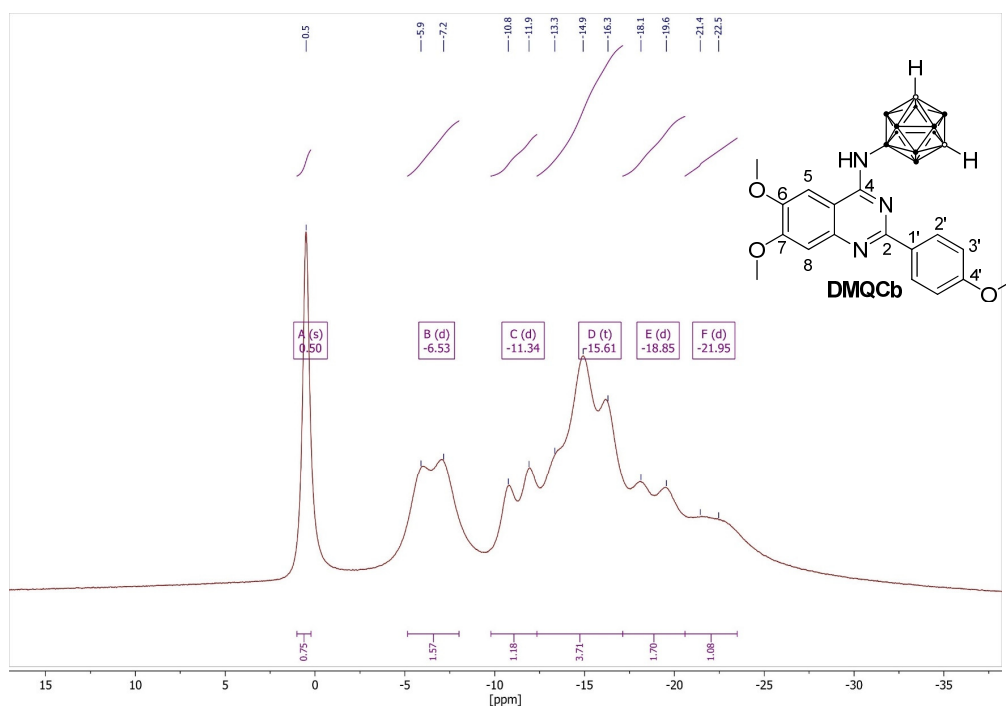

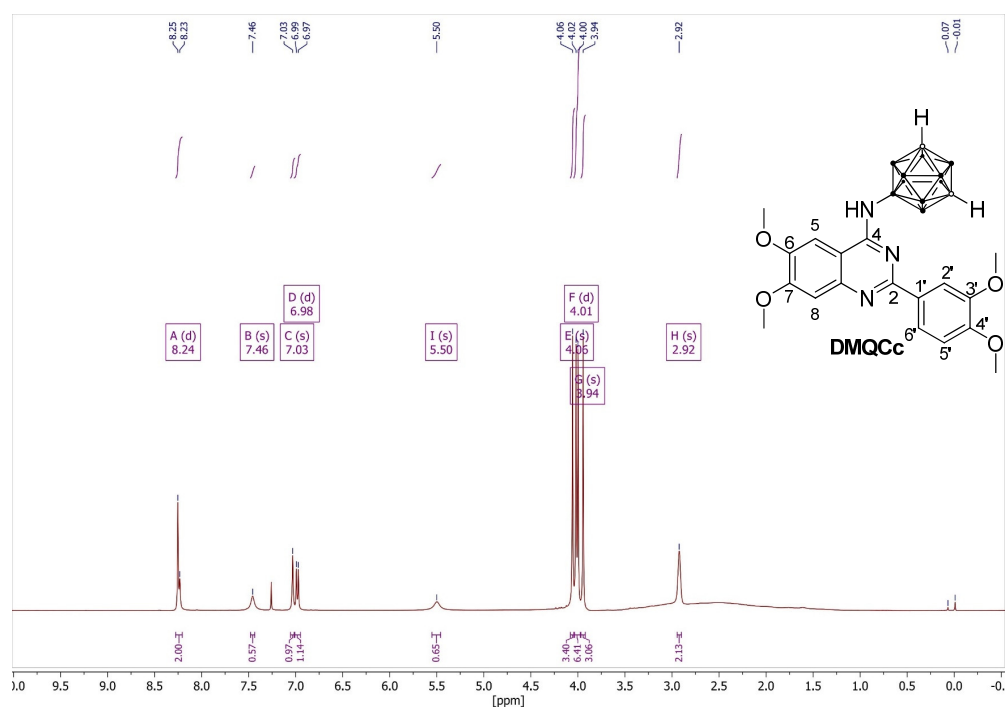

Figure S46.  $^1\text{H}$  NMR spectrum of DMQcC in  $\text{CDCl}_3$ .

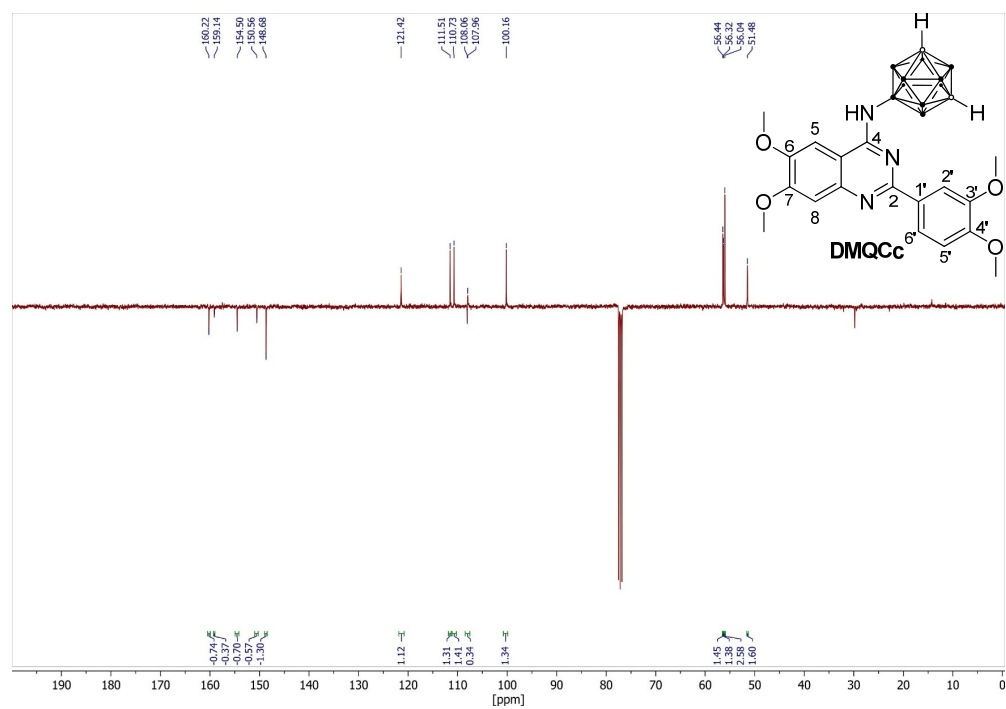

Figure S47. APT- $^{13}\text{C}\{^1\text{H}\}$  NMR spectrum of DMQcC in  $\text{CDCl}_3$ .

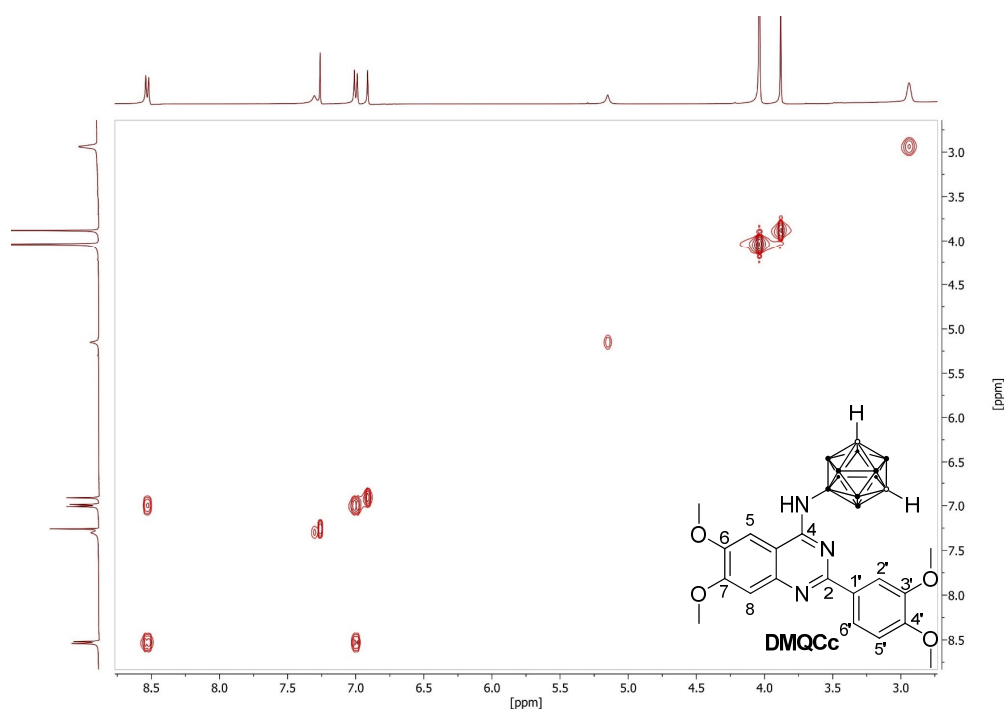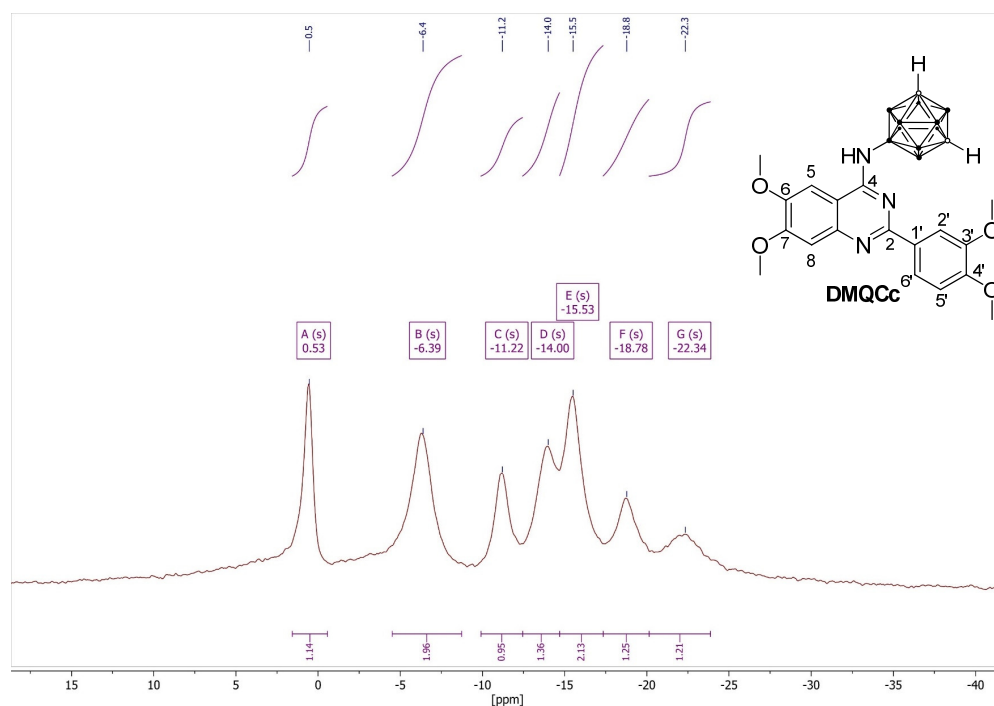

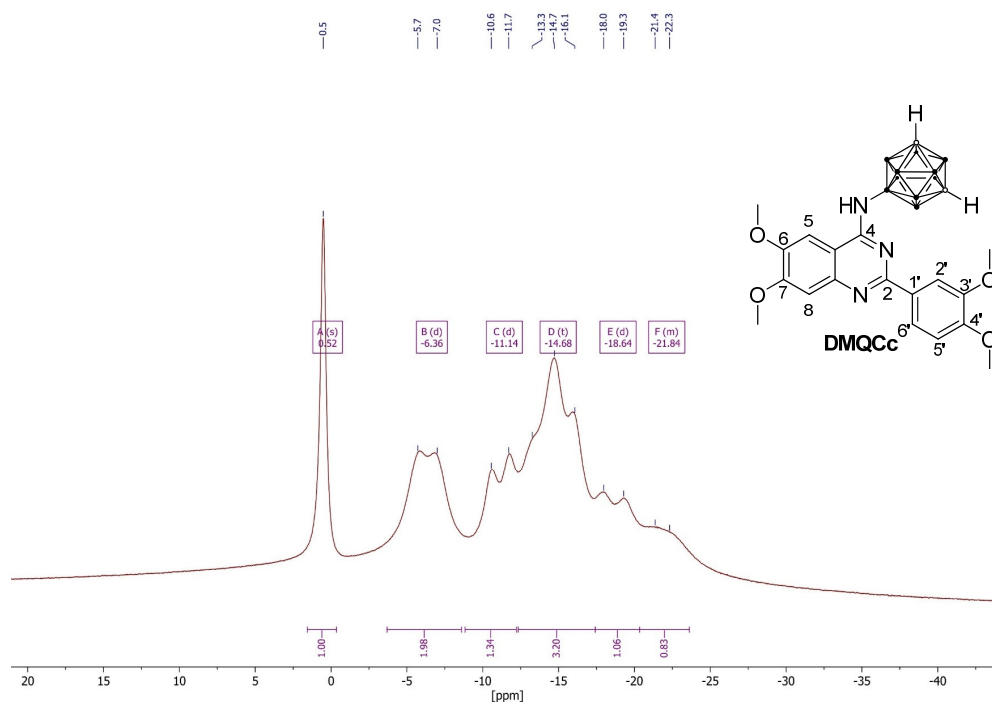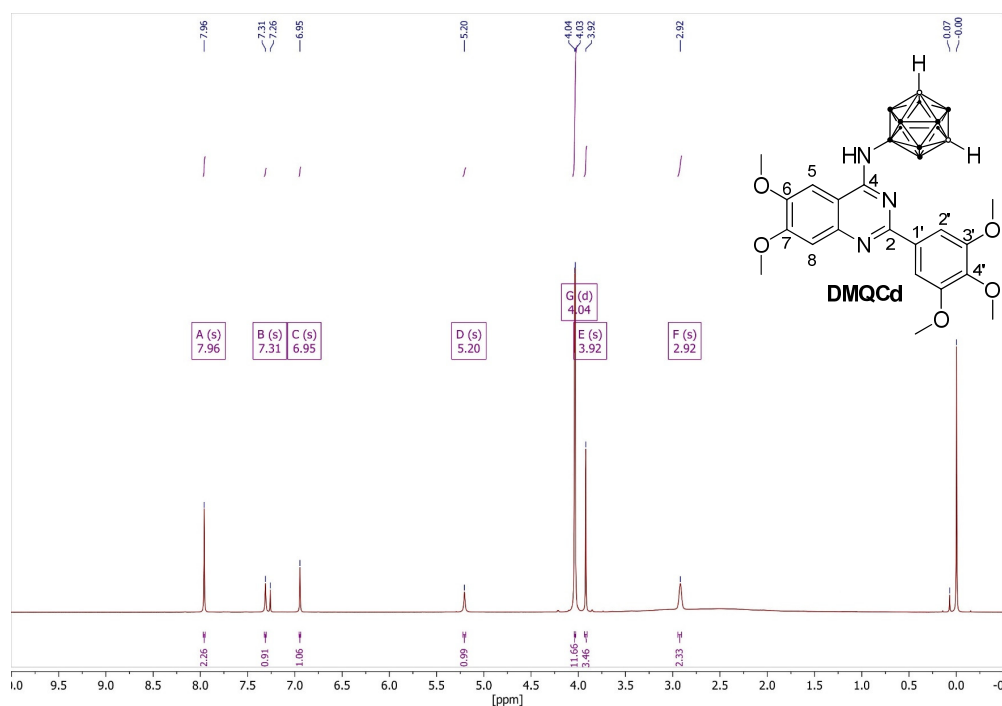

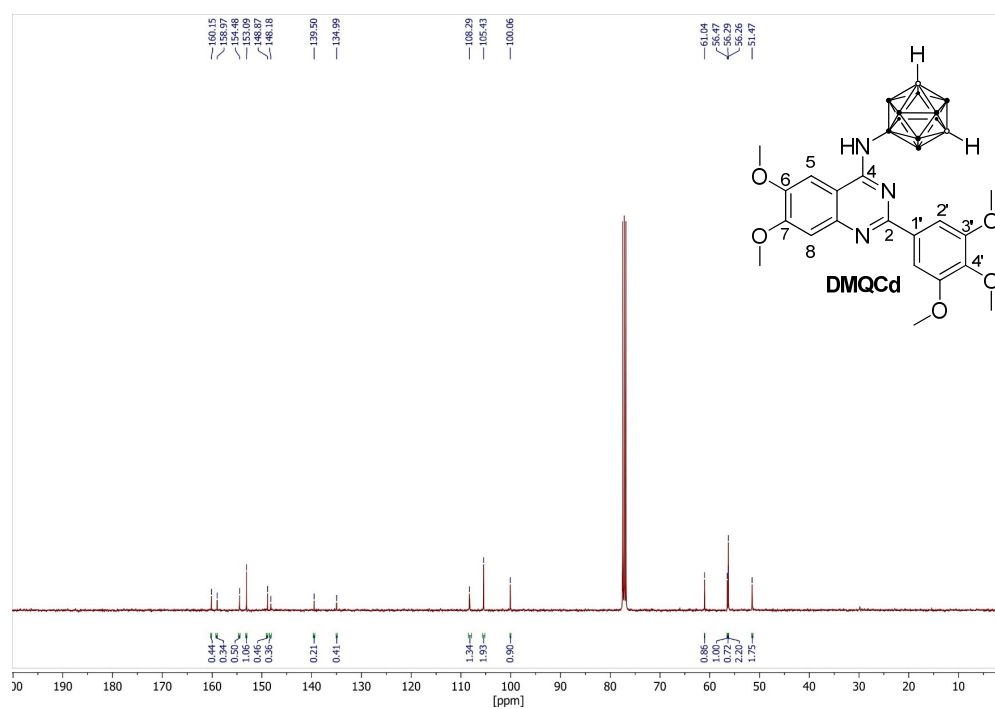

Figure S52.  $^{13}\text{C}\{^1\text{H}\}$  NMR spectrum of DMQcd in  $\text{CDCl}_3$ .

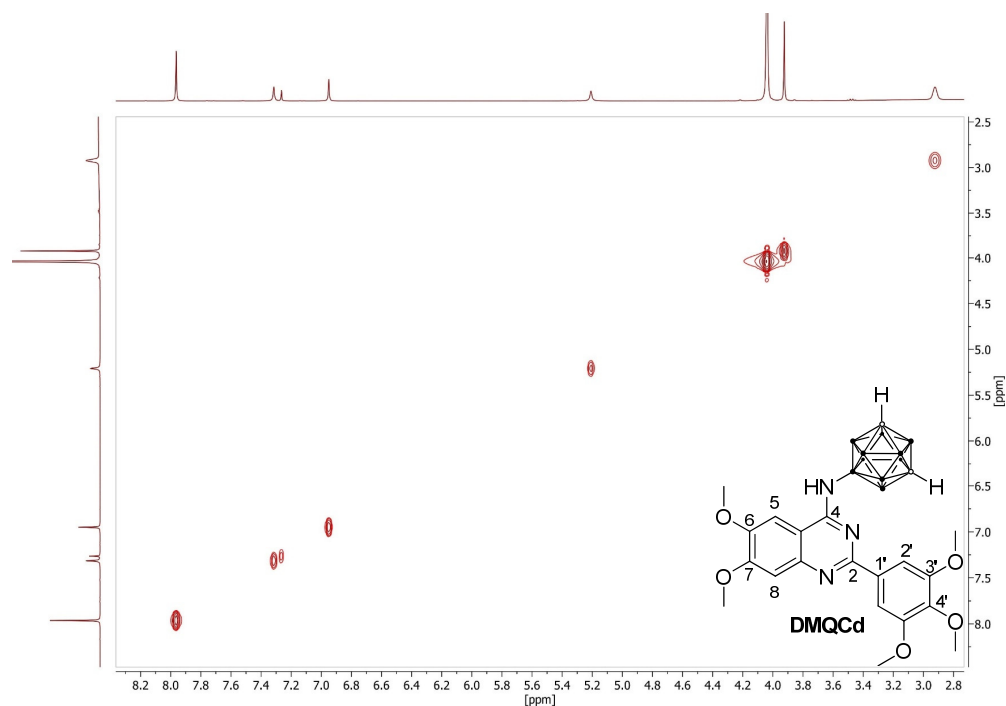

Figure S53.  $^1\text{H}$ -COSY NMR spectrum of DMQcd in  $\text{CDCl}_3$ .



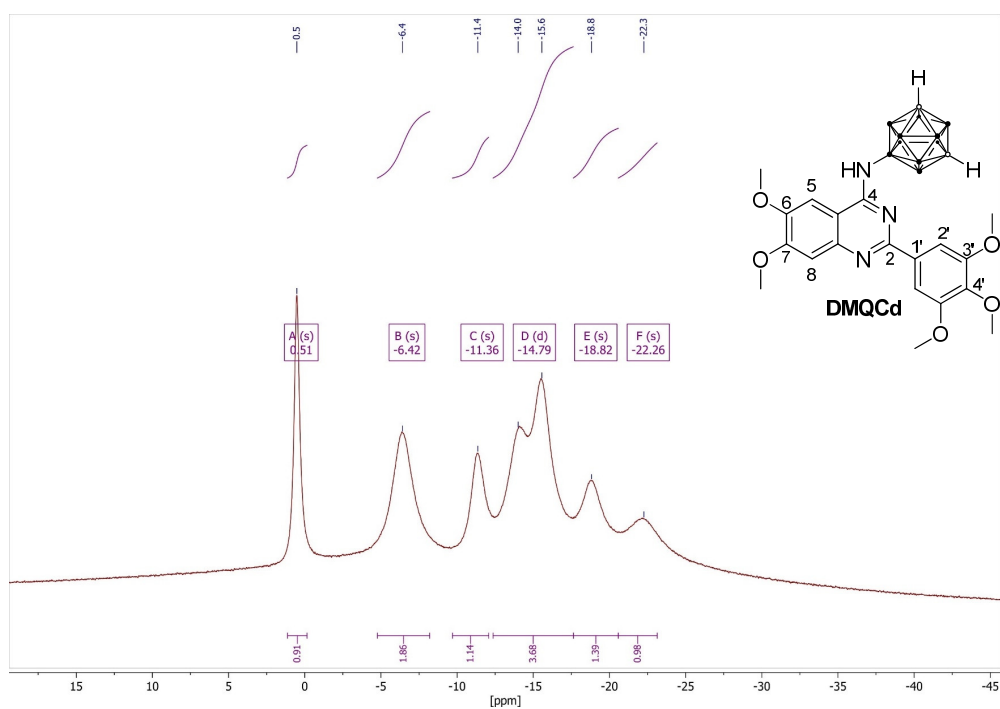

Figure S54.  $^{11}\text{B}\{^1\text{H}\}$  NMR spectrum of DMQcd in  $\text{CDCl}_3$ .

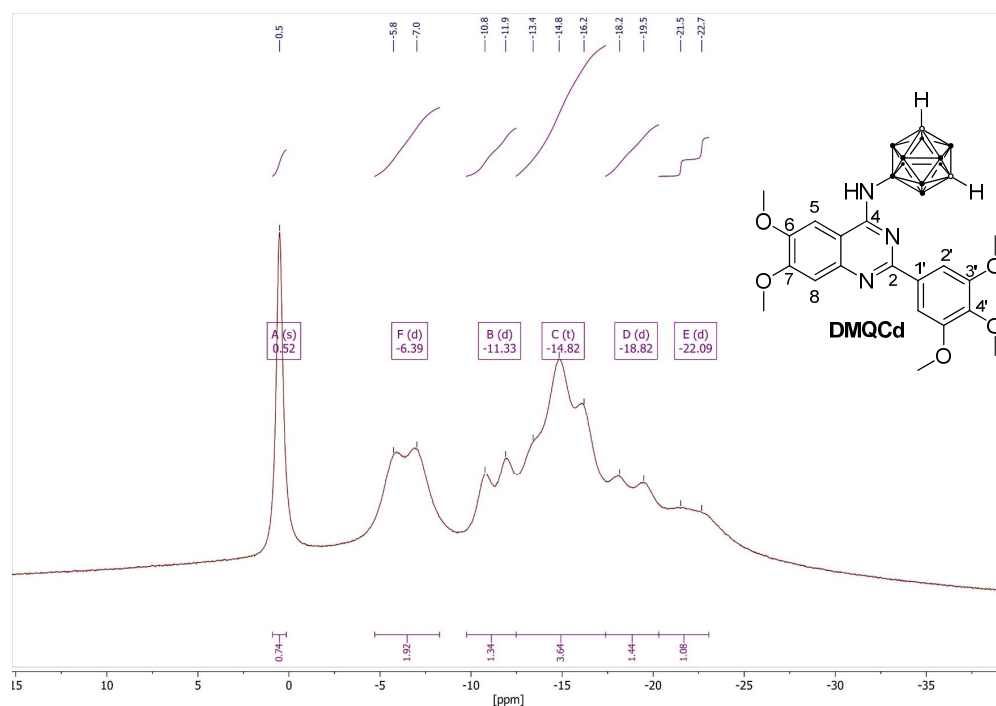

Figure S55.  $^{11}\text{B}$  NMR spectrum of DMQcd in  $\text{CDCl}_3$ .

## 2. Biological Data

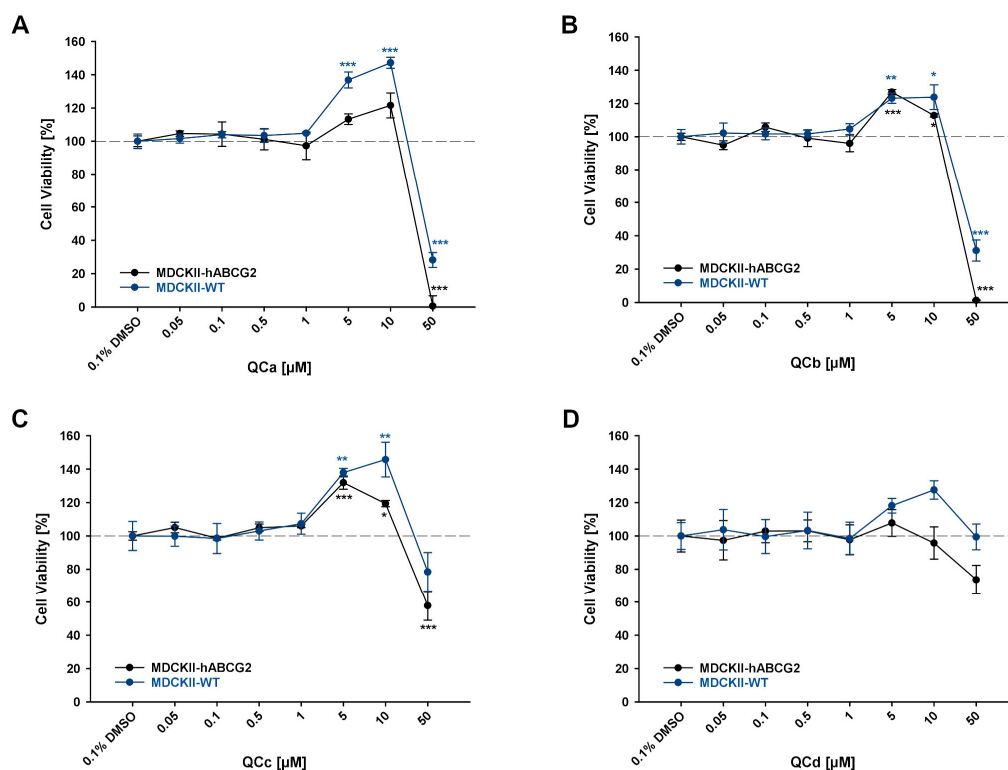

**Figure S56.** Cytotoxicity of quinazoline derivatives (A) QCa, (B) QCb, (C) QCc, and (D) QCd. MDCKII-hABCG2 and MDCKII-WT cells were incubated with selected compounds in increasing concentrations for 48 h. Afterwards, cell viability was assessed by water-soluble tetrazolium-1 (WST-1) assay. Data were normalized to solvent control (0.1% DMSO) and set as 100% (mean  $\pm$  SEM, N = 3, one-way ANOVA with Holm-Šidák post hoc test, \* significant difference in comparison to the solvent control. \*\*\*  $p \leq 0.001$ , \*\*  $p \leq 0.01$ , \*  $p \leq 0.05$ ).

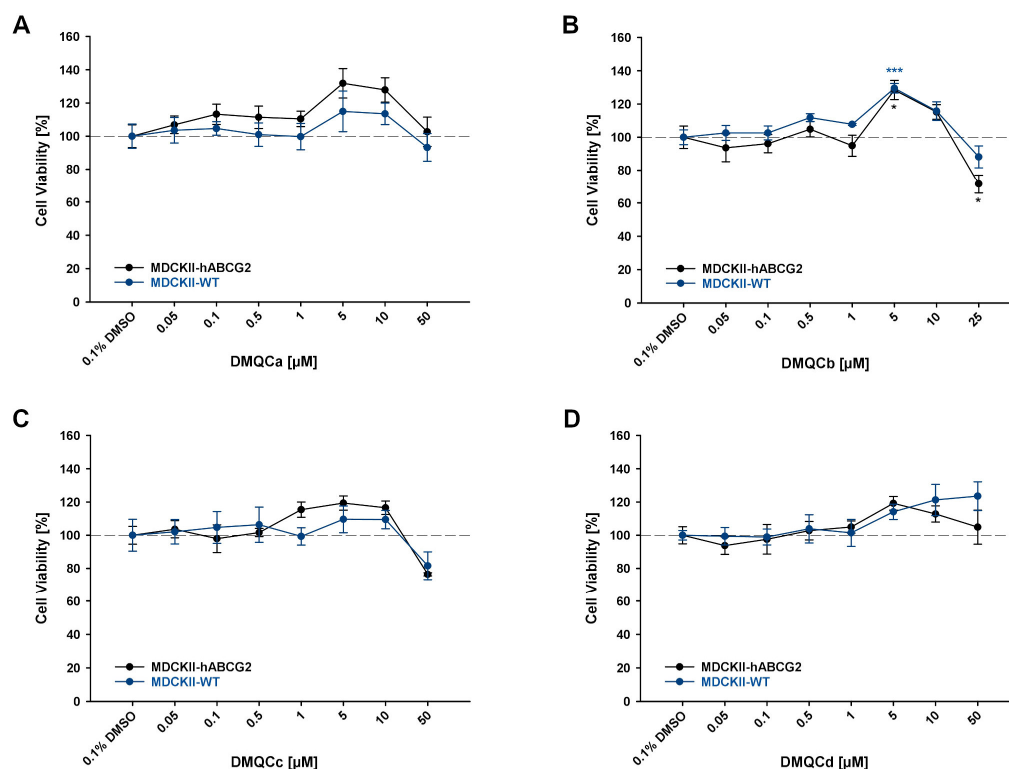

**Figure S57.** Cytotoxicity of dimethoxyquinazoline derivatives (A) **DMQCa**, (B) **DMQCb**, (C) **DMQCc**, and (D) **DMQCd**. MDCKII-hABCG2 and MDCKII-WT cells were incubated with dimethoxyquinazoline derivatives in increasing concentrations for 48 h. Afterwards, cell viability was assessed by water-soluble tetrazolium-1 (WST-1) assay. Data were normalized to solvent control (0.1% DMSO) and set as 100% (mean  $\pm$  SEM, N = 3, one-way ANOVA with Holm-Šidák post hoc test, \* significant difference in comparison to the solvent control. \*\*\*  $p \leq 0.001$ , \*  $p \leq 0.05$ ).

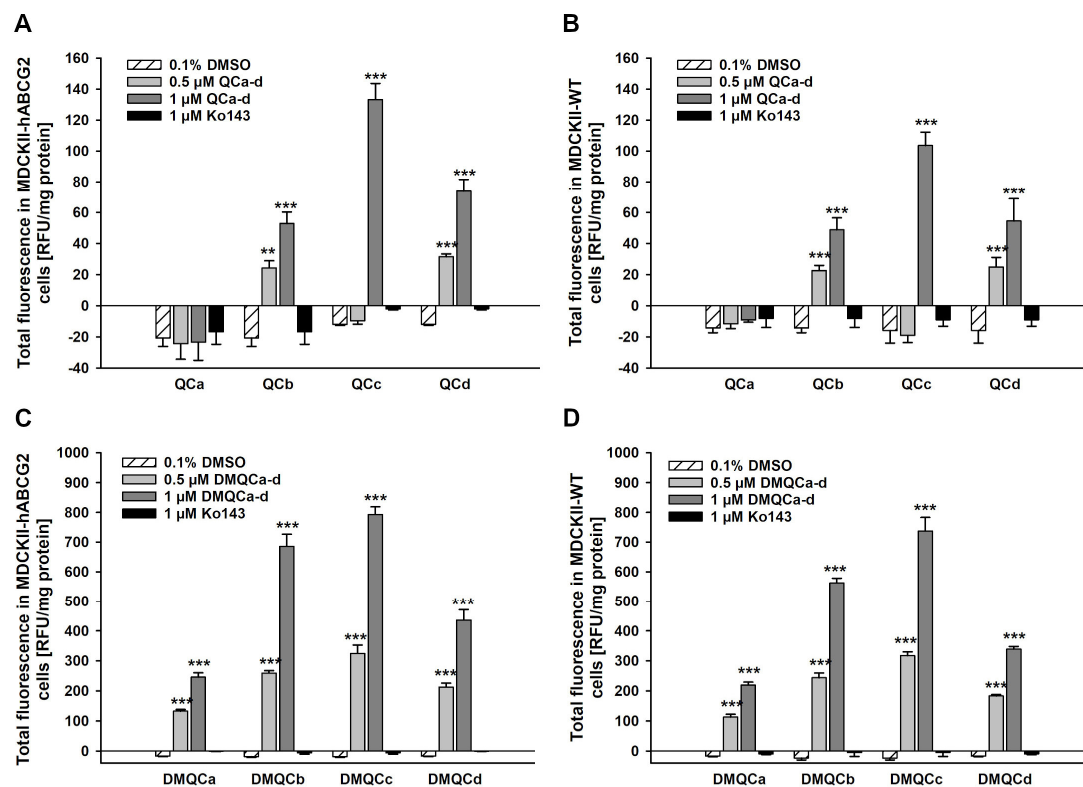

**Figure S58.** Autofluorescence of **QCa-d** in (A) MDCKII-hABCG2 and (B) MDCKII-WT cells, and **DMQCa-d** in (C) MDCKII-hABCG2 and (D) MDCKII-WT cells. Cells were incubated with **QCa-d** and **DMQCa-d** for 4 h and afterwards, cells were lysed and intracellular fluorescence was determined as described (mean  $\pm$  SEM, N = 3, one-way ANOVA with Holm-Šidák post hoc test, \* significant difference in comparison to the solvent control. \*\*\*  $p \leq 0.001$ , \*\*  $p \leq 0.01$ ,).

### 3. Molecular Docking

**Table S1.** Free binding energies of selected compounds towards human ABCG2 transporter in rigid ABCG2 protein (PDB code 5NJ3) and MXN-bound ABCG2 co-crystallized structure (MXN removed from crystal structure prior to docking; PDB code 6VXI).

| Compound | Free binding energy [kcal/mol] |      |
|----------|--------------------------------|------|
|          | 5NJ3                           | 6VXI |
| QCa      | -6.6                           | -5.6 |
| QCb      | -5.7                           | -5.1 |
| QCc      | -7.2                           | -7.0 |
| QCd      | -7.6                           | -5.9 |
| DMQCa    | -6.6                           | -6.1 |
| DMQCb    | -6.1                           | -6.2 |
| DMQCc    | -10.4                          | -9.8 |
| DMQCd    | -8.1                           | -8.3 |

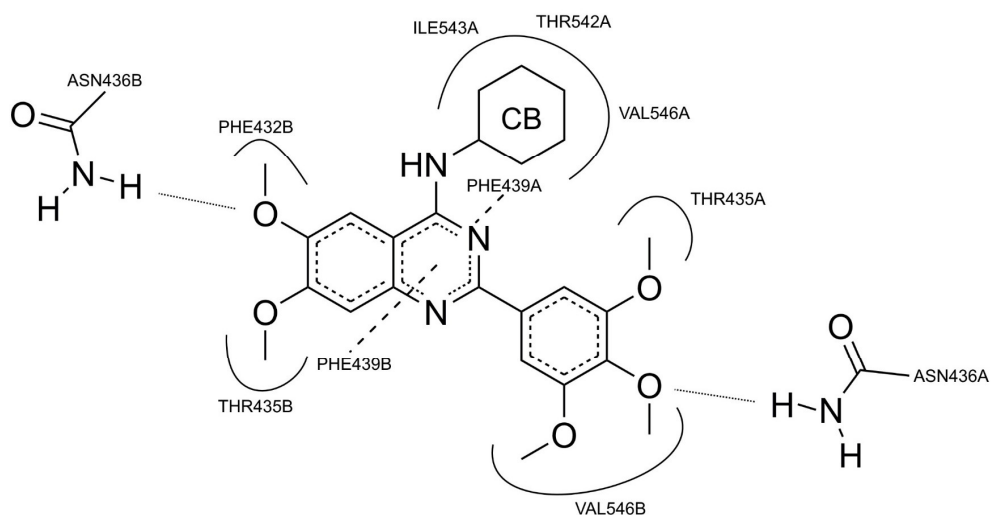

**Figure S59.** 2D interaction diagram of the top score pose of **DMQCd** within the inner cavity of the ABCG2 transporter protein (PDB code 5NJ3; CB equal to *meta*-carborane).
